# Supplementary material for: Molecular signatures and formation mechanisms of particulate matter (PM) water-soluble chromophores from Karachi (Pakistan) over South Asia
Source: Copernicus journal article supplement (doi:10.5194/egusphere-2023-403), 2023-03-29
Supplement: Supplementary file 1 [file egusphere-2023-403-supplement.pdf]

1 *Supplement of*

2 **Molecular signatures and formation mechanisms of particulate matter**  
3 **(PM) water-soluble chromophores from Karachi (Pakistan) over**  
4 **South Asia**

5 Jiao Tang<sup>1</sup>, Jun Li<sup>1</sup>, Shizhen Zhao<sup>1</sup>, Guangcai Zhong<sup>1</sup>, Yangzhi Mo<sup>1</sup>, Hongxing Jiang<sup>2</sup>,  
6 Bin Jiang<sup>1</sup>, Yingjun Chen<sup>2</sup>, Jianhui Tang<sup>3</sup>, Chongguo Tian<sup>3</sup>, Zheng Zong<sup>4</sup>, Jabir Hussain  
7 Syed<sup>5</sup>, Jianzhong Song<sup>1</sup>, Gan Zhang<sup>1</sup>

8

9 <sup>1</sup>State Key Laboratory of Organic Geochemistry and Guangdong province Key  
10 Laboratory of Environmental Protection and Resources Utilization, Guangdong-Hong  
11 Kong-Macao Joint Laboratory for Environmental Pollution and Control, Guangzhou  
12 Institute of Geochemistry, Chinese Academy of Sciences, Guangzhou, 510640, China

13 <sup>2</sup>Shanghai Key Laboratory of Atmospheric Particle Pollution and Prevention (LAP<sup>3</sup>),  
14 Department of Environmental Science and Engineering, Fudan University, Shanghai  
15 200433, China

16 <sup>3</sup>Key Laboratory of Coastal Environmental Processes and Ecological Remediation,  
17 Yantai Institute of Coastal Zone Research, Chinese Academy of Sciences, Yantai,  
18 264003, China

19 <sup>4</sup>Department of Civil and Environmental Engineering, Hong Kong Polytechnic  
20 University, Hong Kong, 999077, China

21 <sup>5</sup>Department of Meteorology, COMSATS University Islamabad (CUI), Islamabad,  
22 45550, Pakistan

23

24 Corresponding Authors:

25 Jun Li: [junli@gig.ac.cn](mailto:junli@gig.ac.cn); Gan Zhang: [zhanggan@gig.ac.cn](mailto:zhanggan@gig.ac.cn)

26

27 **Contents of this file**

28 Texts S1 to S7; Tables S1 to S8; Figures S1 to S14; and References

29 **Text S1. Extraction and analysis of reproducibility and blank levels**

30 The reproducibility and the blank levels of the analysis of the WSOC by carbon  
31 mass analysis, the UV-visible absorption spectrophotometer, and the EEM fluorescence  
32 spectrophotometer were assessed by the duplicate extraction and analysis of an identical  
33 aerosol sample and a blank filter. The concentration of WSOC and WSTN was  
34 quantified using a TOC analyzer (Vario TOC cube; Elementar). The relative standard  
35 deviation (RSD) of WSOC mass by duplicate extraction and duplicate analyses was  
36 less than 1.8 % and 2.6 %, respectively. The RSD for UV-vis spectra of the overall  
37 wavelength (200–800 nm) and EEM spectra at selected Em/Ex = 411/239 nm was 0–  
38 8.1 % and 2.9 %–4.6 %, respectively.

39 The error of WSOC concentration in three blank samples was 7.7 %. No obvious  
40 peaks were observed in the blank EEMs, which were also subtracted from the sample  
41 EEMs. In addition, the fluorescence spectrum of samples was measured with their  
42 absorbance lower than 1.

43 **Text S2. PARAFAC analysis and determination of the optical parameters**

44 The contribution of solvents was subtracted from the extract spectra. To obtain  
45 WSOC quality metrics from EEMs, PARAFAC analysis was conducted using the  
46 drEEM Toolbox in MATLAB version R2016a (<http://models.life.ku.dk/drEEM>, last  
47 access: June 2014) (Murphy et al., 2013). The measured absorbance that was not greater  
48 than 1 at 254 nm was appropriately used to correct the EEM for inner-filter effects (IFEs)  
49 (Kothawala et al., 2013; Murphy et al., 2013). Each EEM was normalized to the Raman  
50 peak area of purified water collected on the same day to correct fluorescence in Raman  
51 units (RU) at an excitation of 350 nm (Lawaetz and Stedmon, 2009), and signals of  
52 first-order Rayleigh and Raman scattering, as well as second-order Rayleigh scattering  
53 in the EEM spectra, were removed using the interpolation (Bahram et al., 2006). The

54 non-negativity constraint is necessary to obtain reasonable spectra according to the  
55 tutorials, and a 2–7 component PARAFAC model based on 96 EEMs was analyzed  
56 along with the residual analysis, visual examination of the component spectra, core  
57 consistency, and validated using split-half analysis to ensure that they are representative  
58 of plausible fluorophores (Murphy et al., 2013). The three-component PARAFAC  
59 solutions passed the split-half analysis with the split style of “S4C6T3” (Fig. S12). A  
60 critical prerequisite to successful PARAFAC modeling is a data set encompassing  
61 enough compositional variability and lacking excessive noise (Murphy et al., 2018).  
62 Once the modeling constraints and criteria have been decided, we ultimately adopt only  
63 the model that represents the least-squares (minimum error) solution.

#### 64 *Optical indices*

65 The specific UV-vis absorbance at 254 nm was successfully used to characterize  
66 the chemical properties of organic fractions in atmospheric samples (Li et al., 2018),  
67 which were obtained by the normalization of UV-vis absorbance at 254 nm by the  
68 organic carbon in the solution, and the equation was listed as follows (Weishaar et al.,  
69 2003):

$$70 \quad \text{SUVA} = A/bc \quad (1)$$

71 Here, SUVA is the specific UV-Vis absorbance ( $\text{m}^2 \text{g}^{-2} \text{C}$ ),  $A$  is the absorbance at  
72 254 nm,  $b$  (m) is the cell path length, and  $c$  ( $\text{mg C L}^{-1}$ ) is the WSOC concentration in  
73 the solutions.

74  $S_R$  was used as a proxy for molecular weight in a broad range of samples, by  
75 calculating the ratio of the slope of the shorter wavelength region (275–295 nm) to that  
76 of the longer wavelength region (330–400 nm) (Helms et al., 2008; Twardowski et al.,  
77 2004). The  $S_R$  was derived from absorption spectra by fitting the absorption data to the  
78 following equations:

$$79 \quad \alpha = 2.303 A / L \quad (2)$$

$$80 \quad \alpha_\lambda = \alpha_{\lambda_{ref}} e^{-s(\lambda - \lambda_{ref})} \quad (3)$$

$$81 \quad S_R = S_{275-295} / S_{330-400} \quad (4)$$

82 Here,  $\alpha$  = the Napierian absorption coefficient ( $m^{-1}$ ),  $A$  = absorbance,  $L$  = path  
83 length (m),  $\lambda$  = wavelength (nm), and  $\lambda_{ref}$  = reference wavelength (nm).

84 In addition, fluorescence indices based on intensity ratios that provide insight into  
85 the origins of dissolved BrC, such as the humification index (HIX) (the ratio of average  
86 emission intensity in the 435–480-nm range to that in the 300–345-nm range following  
87 excitation at 254 nm, which was used to reflect the degree of humification) (Zsolnay et  
88 al., 1999), the biological index (BIX) (the ratio of emission intensities at 380 and 430  
89 nm following excitation at 310 nm, reflecting autochthonous biological activity in water  
90 samples) (Huguet et al., 2009), and fluorescence index (FI) (the ratio of emission  
91 intensities at 470 and 520 nm following excitation at 370 nm, reflecting the possibility  
92 of microbial origin and for examining differences in precursor organic materials) (Lee  
93 et al., 2013; Murphy et al., 2018).

#### 94 ***The calculation of MAE***

95 The light absorption coefficient ( $Abs_{\lambda}$ ,  $Mm^{-1}$ ) was calculated using the following  
96 equation (Yan et al., 2015):

$$97 \quad Abs_{\lambda} = \frac{(A_{\lambda} - A_{700}) \times V_1 \times a \times \ln(10)}{V_a \times a_1 \times l} \quad (5)$$

98 Here,  $A_{\lambda}$  is the value of light absorption at the given wavelength given by the  
99 spectrophotometer;  $V_1$  and  $a_1$  are the volume of ultra-pure deionized water for  
100 extraction and area of the extracted filter;  $V_a$  is the volume of sampling air;  $l$  is the  
101 optical path length. In addition, absorption Ångström exponent (AAE) represents the  
102 wavelength dependence of absorption is calculated ( $Abs = k \cdot \lambda^{-AAE}$ ), and  $K$  is constant.

103 Mass absorption efficiency (MAE,  $m^2 g^{-1} C$ ) can be obtained as follows:

$$104 \quad MAE_{\lambda} = Abs_{\lambda} / C_i \quad (6)$$

105 Here,  $C_i$  ( $\mu g C m^{-3}$ ) is the concentration of WSOC after conversion to the  
106 atmosphere.

#### 107 **Text S3. Evaluation of the SPE method**

108 It is necessary to avoid the interference of inorganic constituents for the molecular

109 characterization of WSOC using FT-ICR MS. The SPE method developed effectively  
110 removed inorganic salts and enriched the organic material from dilute aqueous solutions  
111 (Varga et al., 2001). The cartridges were conditioned and equilibrated with 4 mL of  
112 methanol (HPLC grade) and 5 mL of ultrapure deionized water, respectively. An aliquot  
113 of 20 mL extract was acidified to pH = 2 using hydrochloric acid and loaded on an SPE  
114 cartridge. However, some organic materials, such as low-molecular-weight organic  
115 acids, and sugars were not retained by the SPE cartridge and appeared in the effluent  
116 solution (Lin et al., 2010). Thus, to assess the efficiency of SPE, we measured the total  
117 organic carbon masses, UV–vis absorption, and EEM spectra of the original samples  
118 and eluents, which ensured that the majority of organics were preserved on the  
119 cartridges. In this step, the WSOC mass of eluents accounted for 67 %±3.3 % of original  
120 WSOC samples on average. In addition, the light absorbance at 280 nm of eluents  
121 accounted for 80 %±6.3 % of original samples on average, indicating most of the light-  
122 absorbing organics were retained on cartridges. In fluorescence spectroscopic  
123 measurements average of 97 %±7.7% of the total fluorescence intensity at Em/Ex =  
124 411/239 nm was detected in the eluate, suggesting the fluorescent compounds were  
125 almost entirely retained in the columns. Normally, the low-molecular-weight organic  
126 acids, and sugars in the effluent were not in the detected m/z range of 150–800.

127 The ammonia added to methanol as elution was to drop the percentage of the  
128 irreversibly absorbed carbon mass (Lin et al., 2010). In addition, ammonia was selected  
129 for its volatility so that it could be removed from the eluate by evaporation to dryness.

#### 130 **Text S4. FT-ICR MS data processing**

131 The mass spectra were externally calibrated with arginine clusters using a linear  
132 calibration and then internally recalibrated with typical O<sub>6</sub>S<sub>1</sub> class species peaks using  
133 quadratic calibration in DataAnalysis version 4.4 (Bruker Daltonics). Custom software  
134 was applied to calculate all mathematically possible formulas for all ions with a signal-  
135 to-noise ratio > 4 using a mass tolerance of ± 1.0 ppm. The formula assigned to peaks

136 with elemental combinations of  $^{12}\text{C}_{1-80}^{1}\text{H}_{1-200}^{16}\text{O}_{0-50}^{14}\text{N}_{0-4}^{32}\text{S}_{0-2}$  in the ESI<sup>-</sup> and  
137  $^{12}\text{C}_{1-80}^{1}\text{H}_{1-200}^{16}\text{O}_{0-50}^{14}\text{N}_{0-4}^{32}\text{Na}_{0-1}$  in the ESI<sup>+</sup> mode was identified. Identified formulas  
138 with isotopomers (i.e.,  $^{13}\text{C}$ ,  $^{18}\text{O}$ , or  $^{34}\text{S}$ ) were not discussed in this study.

139 The double bond equivalent (DBE) values of the neutral formulas were calculated  
140 using as follows (Lin et al., 2012):

$$141 \quad \text{DBE} = (2c + 2 - h + n)/2 \quad (7)$$

142 The modified aromaticity index ( $\text{AI}_{\text{mod}}$ ) values were obtained from the equation  
143 (Koch and Dittmar, 2006):

$$144 \quad \text{AI}_{\text{mod}} = (1 + c - 0.5o - s - 0.5h)/(c - 0.5o - s - n) \quad (8)$$

145 The carbon oxidation state ( $\overline{\text{OS}}_{\text{C}}$ ) was previously observed to increase with  
146 oxidation for atmospheric organic aerosol and was strongly linked to aerosol volatility  
147 (Kroll et al., 2011). The  $\overline{\text{OS}}_{\text{C}}$  of each formula was calculated using the following  
148 equation:

$$149 \quad \overline{\text{OS}}_{\text{C}} = -\sum_i \text{OS}_i \frac{n_i}{n_{\text{C}}} \quad (9)$$

150 where the summation is over all non-carbon elements,  $\text{OS}_i$  is the oxidation state  
151 associated with element  $i$ , and  $n_i/n_{\text{C}}$  is the molar ratio of element  $i$  to carbon.

152 We calculated the nominal oxidation state of carbon (Kellerman et al., 2015; Lv et  
153 al., 2016):

$$154 \quad \text{NOSC} = 4 - \left[ \frac{4c + h - 3n - 2o - 2s}{c} \right] \quad (10)$$

155 where  $c$ ,  $h$ ,  $n$ ,  $o$ , and  $s$  refer to the number of atoms per formula of carbon, hydrogen,  
156 nitrogen, oxygen, and sulfur, respectively.

### 157 **Text S5. Spearman's rank correlation analysis**

158 Spearman's rank correlation analysis between relative FT-ICR MS peak intensities  
159 and percent PARAFAC components and optical parameters was performed to identify  
160 molecular families associated with PARAFAC components and optical parameters.  
161 Formulas that appeared in fewer than two samples were not considered; thus, a total of  
162 7687 ESI<sup>-</sup> formulas and 6564 ESI<sup>+</sup> formulas were included. The Spearman correlation

163 coefficient is defined as the Pearson correlation coefficient between the rank variables.  
164 For an n of 12 samples, the 12 raw scores  $X_i$  (i.e. percent PARAFAC components,  
165 optical indices, Abs<sub>365</sub>),  $Y_i$  (i.e. relative FT-ICR MS intensities) are converted to ranks  
166  $R(X_i)$ ,  $R(Y_i)$ , and Spearman's coefficient ( $r_s$ ) is computed. To assess the significance of  
167 the  $r_s$ , a Student's t test was performed. For an n of 12 samples, the threshold of a  $r_s$   
168 was computed to be significant at the  $\alpha = 0.05$  confidence level, using the following  
169 equation:

$$170 \quad t = \frac{r\sqrt{n-2}}{\sqrt{1-r^2}} \quad (11)$$

171 where  $t = 2.201$  for  $n = 12$ . Therefore, a  $r_s$  of 0.57 was calculated to be significant  
172 at the 95% confidence limit. And, the molecular formulas associated with PARAFAC  
173 components and optical parameters across the 12 samples with Spearman's  $r_s \geq 0.57$   
174 were assigned to each PARAFAC component and optical parameter (Stubbins et al.,  
175 2014; Singer et al., 2012). Note that many formulas were not fluorophores or  
176 chromophores but had similar sources or biogeochemical processes with the  
177 corresponding fluorophores or chromophores.

### 178 **Text S6. Redundancy Analysis (RDA)**

179 RDA is a method combining regression and principal component analysis (PCA).  
180 It is a direct extension of multiple regression analysis to model multivariate response  
181 data. In this study, we assumed that the indices derived from optical measurement (FI,  
182 BIX, HIX, A<sub>254</sub>, SUVA<sub>254</sub>, and S<sub>R</sub>) are representative of the important chemical  
183 properties of WSOC. Hence, to explore the relationships between these chemical  
184 characteristics and fluorescent components, we conducted an RDA model by using the  
185 fluorescent component as response variables and these optical indices as explanatory  
186 variables. The RDA was preceded using the "vegan" package in R (Oksanen et al.,  
187 2022). Before analysis, we used the **decorana()** function to identify whether the model  
188 is suitable for RDA. We checked the length of the first DCA axis (which is scaled in  
189 units of standard deviation, S.D.), and the value was 0.29, which was far low than 3

190 S.D, indicating a homogeneous dataset for which linear methods are suitable (Ramette,  
191 2007); hence, we select the RDA model. We began this process while exploring the data:  
192 our response data is Hellinger-transformed, and our explanatory variables are centered  
193 and standardized. The RDA result indicated that 69.5 % of the response variables could  
194 be explained by the optical indices.

195 In addition, we performed a permutation test for the RDA results, including a  
196 global RDA significance, all canonical axis significance, and explanatory variables  
197 significance. The permutation test result for all and each canonical axis are shown in  
198 Table S7, showing that our full model is statistically significant ( $p = 0.001$ ), and the  
199 selected two canonical axes resulting from the RDA is also statistically significant ( $p =$   
200  $0.001$ ). In addition, every variable included in this model is significant as well ( $p =$   
201  $0.001$ ), except for  $SUVA_{254}$  ( $p = 0.010$ ). In addition, it is reasonable to look at the  
202 residual variation in the data by using the Kaiser-Guttman criterion. There may still be  
203 some variation in these data that has not been explained by our set of explanatory  
204 variables.

205 Sometimes, we also wish to reduce the number of explanatory variables for  
206 seeking parsimony and the possible strong linear dependencies (correlations) among  
207 the explanatory variables in the RDA model, which could render the regression  
208 coefficients of the explanatory variables in the model unstable. Linear dependencies  
209 can be explored by using computing the variables' variance inflation factors (VIF).  
210 Normally, VIF values above 20 indicate strong collinearity. Ideally, VIFs above 10  
211 should be at least examined and avoided if possible. In the current study, the VIF values  
212 of all explanatory variables are lower than 10, indicating no obvious collinearity. In  
213 addition, model simplification to reduce the number of variables indicated explanatory  
214 variables can be selected by the forward, backward, or stepwise selection that removes  
215 non-significant explanatory variables. In RDA, the forward selection is the method  
216 most often applied because it works even in cases where the number of explanatory  
217 variables is larger. Even though we had only six explanatory variables, we used the



218 method of forward selection with functions **ordiR2step()**. The decision to retain a  
219 variable or to stop the procedure was made on two stopping criteria: a pre-selected  
220 significance level  $\alpha$ , and the adjusted coefficient explanatory variables ( $R^2_{\text{adj}}$ ) of the  
221 global model. In forward selection, variables are added in order of decreasing F-values  
222 (or increasing  $R^2_{\text{adj}}$ ), each addition being tested by permutation, and stops when the  
223 permutational probability exceeds the predefined  $\alpha$  significance level (or  $R^2_{\text{adj}}$  of the  
224 global model). These analyses show that the response variables would be to settle for a  
225 model containing the six explanatory variables (HIX,  $S_R$ , BIX, FI,  $A_{254}$ , and  $SUVA_{254}$ )  
226 (Table S8).

### 227 **Text S7. Atmospheric PARAFAC components differ from the aquatic** 228 **environment**

229 The EEM-based method was initially used to characterize the DOM fraction in the  
230 aquatic environment, and further extended to the atmosphere. Therefore, the name and  
231 the possible fate of atmospheric fluorescent components were previously referred to as  
232 that aquatic DOM. However, multiple studies have shown that the atmospheric  
233 chromophores maybe not same as the similar character in other environments (Wu et  
234 al., 2021; Jiang et al., 2022), yet direct evidence is lacking. In this study, we examined  
235 molecular-level differences between the fluorescent components in the atmosphere and  
236 aquatic environment. The molecular signatures of PARAFAC components of DOM in  
237 rivers and streams as well as lakes have been determined by using Spearman's  
238 correlation analysis (Stubbins et al., 2014; Kellerman et al., 2015). The VK space of  
239 molecular families assigned to PARAFAC components and excitation and emission  
240 maxima in our study along with those in rivers and streams, and lakes, were shown in  
241 Fig. S14. Several PARAFAC components from aquatic DOM samples were more  
242 inclined to group within the region of aromatic compounds, exhibiting lower average  
243 H/C ratios than those from aerosol samples, inconsistent with their emission maxima.  
244 For example, P6 (in rivers and streams), C6 (in lakes), and C3 in this study (Fig. S14)

245 are all defined as protein-like components with similar excitation and emission maxima,  
246 yet P6 formulas had lower H/C ratios and higher O/C ratios. C2 in aerosol samples had  
247 a higher emission/excitation maximum than C1 (in lakes), conversely, C2 (in aerosol)  
248 formulas grouped in the region of highly unsaturated and phenolic compounds, yet C1  
249 (in lakes) formulas grouped in aromatic compounds region, implying although similar  
250 fluorescence pattern and Ex/Em maximum of PARAFAC components, their chemical  
251 properties vary in different environments, such as an unsaturated degree. The  
252 phenomenon indicated that the fluorescent components may be not only affected by the  
253 chemical structure, but other factors, such as processes, and origins, could be  
254 responsible for the pattern or location of EEM spectra. Optical indices such as SUVA<sub>254</sub>,  
255 A<sub>254</sub>, and HIX-assigned formulas in lake DOM prefer the bottom right corner of the VK  
256 diagram compared to that in aerosols (detail in Fig. S13), strongly suggesting they had  
257 different chemical properties in various environments. Although fluorescence-based  
258 methods have been extended to OA, this study provided molecular-related evidence that  
259 the molecular basis of fluorophores and optical parameters in atmospheric WSOC differ  
260 from the characteristics of aquatic DOM.

261  
262

263 **Table S1.** Summary of the climate, the concentration of total suspended particulate (TSP), WSOC,  
 264 WSTN, and ions, and optical characteristics of the aerosol samples in Karachi (Pakistan) during  
 265 different seasons.

|                                                        | Annual<br>(n=96) | Pre-monsoon<br>(n=28) | Monsoon<br>(n=26) | Post-<br>monsoon<br>(n=14) | Winter<br>(n=28) |
|--------------------------------------------------------|------------------|-----------------------|-------------------|----------------------------|------------------|
| <b>Meteorology</b>                                     |                  |                       |                   |                            |                  |
| Temperature (°C)                                       | 27±4.3           | 29±2.5                | 30±1.6            | 27±3.4                     | 22±3.7           |
| Pressure (Pa)                                          | 755±4.7          | 755±3.0               | 750±2.3           | 758±2.6                    | 760±1.8          |
| Relative humidity (%)                                  | 61±17            | 63±13                 | 73±5.8            | 59±19                      | 48±19            |
| Wind speed (m s <sup>-1</sup> )                        | 3.5±2.0          | 3.9±1.4               | 4.9±1.3           | 2.0±1.1                    | 2.6±2.3          |
| Visibility (km)                                        | 3.9±0.4          | 4.0±0                 | 4.0±0             | 3.8±0.38                   | 3.6±0.70         |
| <b>Concentrations</b>                                  |                  |                       |                   |                            |                  |
| TSP (µg m <sup>-3</sup> )                              | 417±141          | 468±135               | 390±133           | 378±120                    | 412±154          |
| WSOC (µg m <sup>-3</sup> )                             | 5.7±2.8          | 4.7±1.6               | 3.9±1.6           | 6.9±3.2                    | 7.8±2.8          |
| WSTN (µg m <sup>-3</sup> )                             | 2.1±1.1          | 1.9±0.46              | 1.2±0.52          | 2.7±0.8                    | 2.8±1.5          |
| *NO <sub>3</sub> <sup>-</sup> (µg m <sup>-3</sup> )    | 5.6±4.5          | 4.2±1.1               | 2.6±1.5           | 7.3±3.3                    | 8.8±6.4          |
| *NH <sup>+</sup> (µg m <sup>-3</sup> )                 | 1.2±0.55         | 1.2±0.44              | 0.87±0.47         | 1.5±0.35                   | 1.5±0.60         |
| *SO <sub>4</sub> <sup>2-</sup> (µg m <sup>-3</sup> )   | 17±6.0           | 15±2.9                | 17±5.7            | 18±4.4                     | 18±8.6           |
| <b>Optical variables</b>                               |                  |                       |                   |                            |                  |
| FI                                                     | 1.7±0.18         | 1.7±0.14              | 1.7±0.23          | 1.7±0.19                   | 1.7±0.15         |
| BIX                                                    | 0.80±0.15        | 0.74±0.10             | 0.77±0.17         | 0.92±0.17                  | 0.83±0.13        |
| HIX                                                    | 3.6±1.21         | 4.1±0.92              | 3.4±1.5           | 2.8±0.65                   | 3.7±1.2          |
| S <sub>R</sub>                                         | 1.3±0.21         | 1.4±0.18              | 1.4±0.22          | 1.3±0.16                   | 1.2±0.17         |
| A <sub>254</sub> (m <sup>-1</sup> )                    | 0.07±0.05        | 0.04±0.02             | 0.04±0.03         | 0.12±0.05                  | 0.12±0.05        |
| SUVA <sub>254</sub> (m <sup>2</sup> g <sup>-1</sup> C) | 1.7±0.60         | 1.5±0.42              | 1.2±0.37          | 2.0±0.51                   | 2.1±0.56         |
| Abs <sub>365</sub> (Mm <sup>-1</sup> )                 | 5.1±4.2          | 3.3±1.7               | 2.5±2.0           | 6.9±5.3                    | 8.5±4.4          |
| MAE <sub>365</sub> (m <sup>2</sup> g <sup>-1</sup> C)  | 0.81±0.40        | 0.69±0.27             | 0.59±0.27         | 0.92±0.36                  | 1.1±0.46         |
| AAE                                                    | 4.5±0.69         | 4.4±0.66              | 4.4±0.85          | 4.6±0.61                   | 4.5±0.59         |
| C1%                                                    | 57±5%            | 59±5%                 | 55±6%             | 58±2%                      | 58±4%            |
| C2%                                                    | 23±4%            | 22±3%                 | 21±5%             | 21±3%                      | 25±6%            |
| C3%                                                    | 20±6%            | 19±4%                 | 24±7%             | 21±4%                      | 18±6%            |

266 \*described in our previous study (Zong et al., 2020)

267

268 **Table S2.** The MAE<sub>365</sub> and AAE of WSOC reported in recent studies across South Asia.

| Site                                              | Size                  | Sampling period   | AAE       | Fitting wavelength | MAE <sub>365</sub> (m <sup>2</sup> g <sup>-1</sup> C) | References                |
|---------------------------------------------------|-----------------------|-------------------|-----------|--------------------|-------------------------------------------------------|---------------------------|
| Karachi, Pakistan                                 | TSP                   | 2016–2017         | 4.5±0.69  | 330–400            | 0.81±0.40                                             | In this study             |
| New Delhi                                         | PM <sub>2.5</sub>     |                   | 3.2±0.22  |                    | 2.5±0.3                                               |                           |
| Bhola Island in the delta of Bay of Bengal (BCOB) | PM <sub>2.5</sub>     | 2016 winter       | 5.4±0.30  | 330–400            | 1.4±0.2                                               | Dasari et al. (2019)      |
| Northern region of Maldives (MCOH), Indian Ocean  | PM <sub>1</sub>       |                   | 6.9±0.26  |                    | 0.4±0.1                                               |                           |
| MCOH                                              | PM <sub>2.5</sub>     | 2012 winter       | 7.2±0.7   | 330–400            | 0.46±0.18                                             | Bosch et al. (2014)       |
| Kharagpur, Indo-Gangetic Plain (IGP)              | PM <sub>2.5</sub>     | 2009–2010 winter  | 6±1.1     | 330–480            | 0.78±0.24                                             | Srinivas and Sarin (2014) |
| Bay of Bengal (IGP outflow)                       | PM <sub>10</sub> /TSP | 2008–2009 winter  | 9.1±2.5   | 330–480            | 0.45±0.14                                             | Srinivas and Sarin (2013) |
| Godavari, Nepal                                   | PM <sub>10</sub>      | 2012–2014         | 5.23±0.52 | 300–400            | 0.77±0.23                                             | Wu et al. (2019)          |
| New Delhi, India                                  | PM <sub>2.5</sub>     | 2010 winter       | 5.1±2     | 330–400            | 1.6±0.5                                               | Kirillova et al. (2014)   |
| Kanpur, IGP                                       | PM <sub>2.5</sub>     | 2014–2015 winter  | 4.4±0.4   | 300–700            | 2.5±0.5                                               | Choudhary et al. (2021)   |
|                                                   |                       | 2014–2015 monsoon | 3.8±0.6   | 300–700            | 1.3±0.3                                               |                           |
| Patiala, IGP                                      | PM <sub>2.5</sub>     | 2011 winter       | 5.1±1.9   | 300–700            | 1.3±0.7                                               | Srinivas et al. (2016)    |
| Kanpur, IGP                                       | PM <sub>1</sub>       | Wintertime        | 2.8±0.6   | 300–700            | 1.8±0.2                                               | Choudhary et al. (2018)   |
| Kathmandu, Nepal                                  | TSP                   | 2013–2018         | 4.6±0.8   | 300–400            | 1.4±0.3                                               | Chen et al. (2020)        |

269

270 **Table S3.** The number of formulas, average molecular weight (MW), and structural groupings of molecular formulas determined by FT-ICR MS in 12 aerosol samples.  
 271 The table also showed the assigned molecular formulas ( $r \geq 0.57$ ) to three fluorescence components (C1–3), and those which did not correlate with any of the PARAFAC  
 272 components.

|                                              | All ESI–<br>compounds | no assigned<br>molecules | C1-   | C2-    | C3-   | All ESI+<br>compounds | no assigned<br>molecules | C1+   | C2+    | C3+   |
|----------------------------------------------|-----------------------|--------------------------|-------|--------|-------|-----------------------|--------------------------|-------|--------|-------|
| no. total formulas                           | 7687                  | 5993                     | 134   | 1328   | 284   | 6564                  | 5054                     | 208   | 1182   | 162   |
| (% of number)                                | (100 %)               | (78 %)                   | (2 %) | (17 %) | (4 %) | (100 %)               | (77 %)                   | (3 %) | (18 %) | (2 %) |
| no. formula without N                        | 3591                  | 2865                     | 49    | 495    | 201   | 2677                  | 2138                     | 82    | 374    | 101   |
| (% of number)                                | (100 %)               | (80 %)                   | (1 %) | (14 %) | (6 %) | (100 %)               | (80 %)                   | (3 %) | (14 %) | (4 %) |
| no. formula with N                           | 4096                  | 3128                     | 85    | 883    | 83    | 3887                  | 2916                     | 126   | 808    | 61    |
| (% of number)                                | (100 %)               | (76 %)                   | (2 %) | (22 %) | (2 %) | (100 %)               | (75 %)                   | (3 %) | (21 %) | (2 %) |
| aliphatic compounds                          | 2829                  | 2522                     | 45    | 138    | 135   | 3209                  | 2690                     | 104   | 358    | 74    |
| (% of number)                                | (100 %)               | (89 %)                   | (2 %) | (5 %)  | (5 %) | (100 %)               | (84 %)                   | (3 %) | (11 %) | (2 %) |
| highly unsaturated and<br>phenolic compounds | 3538                  | 2681                     | 47    | 689    | 136   | 2276                  | 1495                     | 82    | 657    | 60    |
| (% of number)                                | (100 %)               | (76 %)                   | (1 %) | (19 %) | (4 %) | (100 %)               | (66 %)                   | (4 %) | (29 %) | (3 %) |
| aromatic compounds                           | 817                   | 552                      | 16    | 248    | 10    | 647                   | 533                      | 13    | 85     | 21    |
| (% of number)                                | (100 %)               | (68 %)                   | (2 %) | (30 %) | (1 %) | (100 %)               | (82 %)                   | (2 %) | (13 %) | (3 %) |
| condensed aromatic<br>compounds              | 503                   | 238                      | 26    | 253    | 3     | 432                   | 336                      | 9     | 82     | 7     |
| (% of number)                                | (100 %)               | (47 %)                   | (5 %) | (50 %) | (1 %) | (100 %)               | (78 %)                   | (2 %) | (19 %) | (2 %) |
| CHO compounds                                | 2063                  | 1483                     | 30    | 449    | 118   | 541                   | 378                      | 34    | 122    | 14    |
| (% of number)                                | (100 %)               | (72 %)                   | (1 %) | (22 %) | (6 %) | (100 %)               | (70 %)                   | (6 %) | (23 %) | (3 %) |
| CHON compounds                               | 3191                  | 2275                     | 76    | 823    | 49    | 3603                  | 2654                     | 121   | 792    | 58    |

|                              |             |             |             |             |             |             |             |             |             |             |
|------------------------------|-------------|-------------|-------------|-------------|-------------|-------------|-------------|-------------|-------------|-------------|
| (% of number)                | (100 %)     | (71 %)      | (2 %)       | (26 %)      | (2 %)       | (100 %)     | (74 %)      | (3 %)       | (22 %)      | (2 %)       |
| CHOS compounds               | 1528        | 1382        | 19          | 46          | 83          |             |             |             |             |             |
| (% of number)                | (100 %)     | (90 %)      | (1 %)       | (3 %)       | (5 %)       |             |             |             |             |             |
| CHONS compounds              | 905         | 853         | 9           | 10          | 34          |             |             |             |             |             |
| (% of number)                | (100 %)     | (94 %)      | (1 %)       | (1 %)       | (4 %)       |             |             |             |             |             |
| CHONa <sup>+</sup> compounds |             |             |             |             |             | 2136        | 1760        | 48          | 252         | 87          |
| (% of number)                |             |             |             |             |             | (100 %)     | (82 %)      | (2 %)       | (12 %)      | (4 %)       |
| CHN <sup>+</sup> compounds   |             |             |             |             |             | 284         | 262         | 5           | 16          | 3           |
| (% of number)                |             |             |             |             |             | (100 %)     | (92 %)      | (2 %)       | (6 %)       | (1 %)       |
| Average MW                   | 390±99      | 394±100     | 400±112     | 380±91      | 361±84      | 430±140     | 442±142     | 443±127     | 367±110     | 474±142     |
| DBE                          | 7.4±3.9     | 6.9±3.9     | 8.1±3.0     | 9.3±3.6     | 6.3±3.4     | 7.5±4.9     | 7.4±5.1     | 7.6±4.2     | 7.3±3.7     | 8.4±6.9     |
| AI <sub>mod</sub>            | 0.25±0.26   | 0.22±0.24   | 0.31±0.33   | 0.39±0.29   | 0.19±0.17   | 0.25±0.24   | 0.24±0.25   | 0.22±0.20   | 0.27±0.22   | 0.25±0.23   |
| O/C                          | 0.46±0.24   | 0.44±0.24   | 0.48±0.18   | 0.59±0.20   | 0.30±0.12   | 0.29±0.20   | 0.26±0.19   | 0.28±0.16   | 0.39±0.19   | 0.24±0.20   |
| H/C                          | 1.3±0.40    | 1.4±0.39    | 1.2±0.43    | 1.1±0.35    | 1.5±0.32    | 1.5±0.39    | 1.5±0.39    | 1.5±0.33    | 1.4±0.33    | 1.5±0.43    |
| NOSC                         | -0.23±0.72  | -0.33±0.69  | -0.059±0.68 | 0.36±0.52   | -0.77±0.35  | -0.72±0.53  | -0.79±0.50  | -0.82±0.43  | -0.37±0.54  | -0.91±0.44  |
| $\overline{OS}_C$            | -0.43±0.61  | -0.53±0.57  | -0.25±0.59  | 0.12±0.47   | -0.89±0.33  | -0.91±0.46  | -0.98±0.43  | -0.93±0.44  | -0.60±0.50  | -1.0±0.39   |
| N/C                          | 0.050±0.062 | 0.045±0.057 | 0.055±0.062 | 0.076±0.078 | 0.021±0.039 | 0.064±0.084 | 0.062±0.084 | 0.038±0.046 | 0.079±0.086 | 0.043±0.071 |

274 **Table S4.** The formulas assigned to C1–3 with 0N, 1N, 2N, 3N, and 4N. ESI– and ESI+ refer to  
 275 formulas detected in the negative and positive modes, respectively.

|    | Ion sources | Total           | 0N            | 1N            | 2N            | 3N            | 4N          |
|----|-------------|-----------------|---------------|---------------|---------------|---------------|-------------|
| C1 | ESI–        | 134<br>(100 %)  | 49<br>(37 %)  | 66<br>(49 %)  | 9<br>(7 %)    | 10<br>(7 %)   | 0<br>(0 %)  |
|    | ESI+        | 208<br>(100 %)  | 82<br>(39 %)  | 87<br>(42 %)  | 15<br>(7 %)   | 23<br>(11 %)  | 1<br>(0 %)  |
| C2 | ESI–        | 1328<br>(100 %) | 495<br>(37 %) | 328<br>(25 %) | 282<br>(21 %) | 213<br>(16 %) | 10<br>(1 %) |
|    | ESI+        | 1182<br>(100 %) | 374<br>(32 %) | 316<br>(27 %) | 311<br>(26 %) | 162<br>(14 %) | 19<br>(2 %) |
| C3 | ESI–        | 284<br>(100 %)  | 201<br>(71 %) | 74<br>(26 %)  | 9<br>(3 %)    | 0<br>(0 %)    | 0<br>(0 %)  |
|    | ESI+        | 162<br>(100 %)  | 101<br>(62 %) | 18<br>(11 %)  | 5<br>(3 %)    | 26<br>(16 %)  | 12<br>(7 %) |

276

277 **Table S5.** CHO molecules detected in secondary organic aerosol (SOA) from limonene ozonolysis  
 278 (Kundu et al., 2012) that overlapped with CHO formulas assigned to C1–3, respectively. The  
 279 number of CHO (neutral molecules) in this study contains the sum of [CHO–H]<sup>-</sup>, [CHO+H]<sup>+</sup>, and  
 280 [CHO+Na]<sup>+</sup>, and the overlapped molecules only count once.

| Types                   | CHO formulas | m/z     |
|-------------------------|--------------|---------|
| Limonene ozonolysis SOA | 1197 (100 %) | 517±178 |
| C1                      | 46 (42 %)    | 438±121 |
| C2                      | 244 (34 %)   | 364±90  |
| C3                      | 11 (5.3 %)   | 474±77  |

281

282



283 **Table S6.** List of identified CHO products of naphthalene photooxidation, biomass-burning-  
 284 emission, and aqueous-phase reactions of phenols detected in this study.

| Molecular formula                               | C1 | C2 | C3 | Compound type   | References    |
|-------------------------------------------------|----|----|----|-----------------|---------------|
| C <sub>8</sub> H <sub>6</sub> O <sub>2</sub>    |    | 1  |    |                 |               |
| C <sub>8</sub> H <sub>6</sub> O <sub>5</sub>    |    | 1  |    |                 |               |
| C <sub>10</sub> H <sub>6</sub> O <sub>6</sub>   |    | 1  |    |                 |               |
| C <sub>10</sub> H <sub>8</sub> O <sub>5</sub>   |    | 1  |    |                 |               |
| C <sub>10</sub> H <sub>8</sub> O <sub>6</sub>   |    | 1  |    | Naphthalene     | (Siemens et   |
| C <sub>11</sub> H <sub>12</sub> O <sub>7</sub>  |    | 1  |    | photooxidation  | al., 2022)    |
| C <sub>17</sub> H <sub>10</sub> O <sub>6</sub>  |    | 1  |    |                 |               |
| C <sub>18</sub> H <sub>10</sub> O <sub>6</sub>  |    | 1  |    |                 |               |
| C <sub>18</sub> H <sub>12</sub> O <sub>10</sub> |    | 1  |    |                 |               |
| C <sub>19</sub> H <sub>18</sub> O <sub>10</sub> |    | 1  |    |                 |               |
| C <sub>5</sub> H <sub>8</sub> O <sub>3</sub>    |    | 1  |    |                 |               |
| C <sub>6</sub> H <sub>12</sub> O <sub>6</sub>   |    | 1  |    |                 |               |
| C <sub>7</sub> H <sub>12</sub> O <sub>2</sub>   |    | 1  |    |                 |               |
| C <sub>8</sub> H <sub>8</sub> O <sub>6</sub>    |    | 1  |    |                 |               |
| C <sub>8</sub> H <sub>8</sub> O <sub>8</sub>    |    | 1  |    |                 |               |
| C <sub>9</sub> H <sub>18</sub> O <sub>4</sub>   |    | 1  |    |                 |               |
| C <sub>9</sub> H <sub>6</sub> O <sub>4</sub>    | 1  | 1  |    |                 |               |
| C <sub>9</sub> H <sub>6</sub> O <sub>5</sub>    |    | 1  |    |                 |               |
| C <sub>9</sub> H <sub>6</sub> O <sub>6</sub>    | 1  | 1  |    |                 |               |
| C <sub>9</sub> H <sub>6</sub> O <sub>7</sub>    |    | 1  |    |                 |               |
| C <sub>13</sub> H <sub>8</sub> O <sub>7</sub>   |    | 1  |    |                 |               |
| C <sub>13</sub> H <sub>8</sub> O <sub>8</sub>   |    | 1  |    |                 |               |
| C <sub>13</sub> H <sub>8</sub> O <sub>9</sub>   |    | 1  |    |                 |               |
| C <sub>14</sub> H <sub>14</sub> O <sub>6</sub>  |    | 1  |    | Biomass burning | (Mo et al.,   |
| C <sub>14</sub> H <sub>14</sub> O <sub>7</sub>  |    | 1  |    | emission        | 2022;Smith et |
| C <sub>14</sub> H <sub>14</sub> O <sub>10</sub> |    | 1  |    |                 | al., 2009)    |
| C <sub>14</sub> H <sub>14</sub> O <sub>11</sub> |    | 1  |    |                 |               |
| C <sub>14</sub> H <sub>14</sub> O <sub>12</sub> |    | 1  |    |                 |               |
| C <sub>16</sub> H <sub>18</sub> O <sub>10</sub> |    | 1  |    |                 |               |
| C <sub>16</sub> H <sub>18</sub> O <sub>11</sub> |    | 1  |    |                 |               |
| C <sub>16</sub> H <sub>18</sub> O <sub>12</sub> |    | 1  |    |                 |               |
| C <sub>16</sub> H <sub>18</sub> O <sub>7</sub>  |    | 1  |    |                 |               |
| C <sub>16</sub> H <sub>18</sub> O <sub>9</sub>  |    | 1  |    |                 |               |
| C <sub>16</sub> H <sub>24</sub> O <sub>7</sub>  |    | 1  |    |                 |               |
| C <sub>19</sub> H <sub>26</sub> O <sub>3</sub>  |    | 1  |    |                 |               |
| C <sub>20</sub> H <sub>26</sub> O <sub>2</sub>  |    | 1  |    |                 |               |
| C <sub>20</sub> H <sub>26</sub> O <sub>3</sub>  |    | 1  |    |                 |               |
| C <sub>20</sub> H <sub>28</sub> O <sub>2</sub>  |    |    | 1  |                 |               |
| C <sub>20</sub> H <sub>30</sub> O <sub>2</sub>  |    | 1  |    |                 |               |

|                   |   |               |                      |
|-------------------|---|---------------|----------------------|
| $C_{24}H_{44}O_4$ | 1 |               |                      |
| $C_{24}H_{46}O_4$ | 1 |               |                      |
| $C_{12}H_{10}O_7$ | 1 |               |                      |
| $C_{12}H_{12}O_7$ | 1 |               |                      |
| $C_{12}H_{12}O_6$ | 1 |               |                      |
| $C_{15}H_{14}O_6$ | 1 | Aqueous-phase | (Yu et al.,<br>2014) |
| $C_{15}H_{14}O_8$ | 1 | reactions of  |                      |
| $C_{15}H_{16}O_9$ | 1 | phenols       |                      |
| $C_{15}H_{18}O_7$ | 1 |               |                      |
| $C_{16}H_{18}O_9$ | 1 |               |                      |

285

286

287 **Table S7.** Permutation tests of RDA results of a global test first, followed by a test of the canonical  
 288 axes, and the explanatory variables. The number of permutations is 999.

Model: rda (formula = EEM\_hel ~ FI + BIX + HIX + S<sub>R</sub> + A<sub>254</sub> + SUVA<sub>254</sub>, data = env, scale = FALSE)

**Global model**

|          | Df | Variance  | F      | Pr(>F)   |
|----------|----|-----------|--------|----------|
| Model    | 6  | 0.0055059 | 37.163 | 0.001*** |
| Residual | 89 | 0.0021977 |        |          |

**Forward tests for axes**

|          | Df | Variance  | F        | Pr(>F)   |
|----------|----|-----------|----------|----------|
| RDA1     | 1  | 0.0048303 | 202.2108 | 0.001*** |
| RDA2     | 1  | 0.0006743 | 28.2299  | 0.001*** |
| RDA3     | 1  | 0.0000012 | 0.0521   | 1.000    |
| Residual | 92 | 0.0021977 |          |          |

**Terms added sequentially (first to last)**

|                     | Df | Variance   | F       | Pr(>F)   |
|---------------------|----|------------|---------|----------|
| FI                  | 1  | 0.00226944 | 91.9071 | 0.001*** |
| BIX                 | 1  | 0.00073770 | 29.8754 | 0.001*** |
| HIX                 | 1  | 0.00101865 | 41.2529 | 0.001*** |
| S <sub>R</sub>      | 1  | 0.00092849 | 37.6019 | 0.001*** |
| A <sub>254</sub>    | 1  | 0.00041732 | 16.9006 | 0.001*** |
| SUVA <sub>254</sub> | 1  | 0.00013430 | 5.4387  | 0.010**  |
| Residual            | 89 | 0.00219765 |         |          |

289 Signif. codes: 0 '\*\*\*' 0.001 '\*\*' 0.01 '\*' 0.05 '.' 0.1 ' ' 1

290

291 **Table S8.** Forward selection using vegan's **ordiR2step()** function using the two criteria (the  
 292 predefined  $\alpha$  level and  $R^2_{adj}$  of the global model).

---

**Step:  $R^2_{adj} = 0$**   
 Call: EEM\_hel ~ 1

|                       | R <sup>2</sup> .adjusted |         |        |          |
|-----------------------|--------------------------|---------|--------|----------|
| <All variables>       | 0.69548999               |         |        |          |
| + HIX                 | 0.4689567                |         |        |          |
| + BIX                 | 0.30136019               |         |        |          |
| + FI                  | 0.28709195               |         |        |          |
| + S <sub>R</sub>      | 0.19795852               |         |        |          |
| + A <sub>254</sub>    | 0.03880186               |         |        |          |
| + SUVA <sub>254</sub> | 0.01804164               |         |        |          |
| <none>                | 0                        |         |        |          |
|                       | Df                       | AIC     | F      | Pr(>F)   |
| + HIX                 | 1                        | -525.92 | 84.893 | 0.001*** |

---

**Step:  $R^2_{adj} = 0.4689567$**   
 Call: EEM\_hel~ HIX

|                       | R <sup>2</sup> .adjusted |         |        |          |
|-----------------------|--------------------------|---------|--------|----------|
| <All variables>       | 0.69549                  |         |        |          |
| + S <sub>R</sub>      | 0.5885705                |         |        |          |
| + A <sub>254</sub>    | 0.532254                 |         |        |          |
| + FI                  | 0.5017867                |         |        |          |
| + SUVA <sub>254</sub> | 0.4943887                |         |        |          |
| + BIX                 | 0.4734882                |         |        |          |
| <none>                | 0.4689567                |         |        |          |
|                       | Df                       | AIC     | F      | Pr(>F)   |
| + SR                  | 1                        | -549.45 | 28.328 | 0.001*** |

---

**Step:  $R^2_{adj} = 0.5885705$**   
 Call: EEM\_hel ~ HIX + S<sub>R</sub>

|                       | R <sup>2</sup> .adjusted |         |        |          |
|-----------------------|--------------------------|---------|--------|----------|
| <All variables>       | 0.69549                  |         |        |          |
| + A <sub>254</sub>    | 0.6414914                |         |        |          |
| + FI                  | 0.6241883                |         |        |          |
| + SUVA <sub>254</sub> | 0.6146478                |         |        |          |
| + BIX                 | 0.5945623                |         |        |          |
| <none>                | 0.5885705                |         |        |          |
|                       | Df                       | AIC     | F      | Pr(>F)   |
| + A <sub>254</sub>    | 1                        | -561.71 | 14.728 | 0.001*** |

---

**Step:  $R^2_{adj} = 0.6414914$**   
 Call: EEM\_hel ~ HIX + S<sub>R</sub> + A<sub>254</sub>

|                 | R <sup>2</sup> .adjusted |  |  |  |
|-----------------|--------------------------|--|--|--|
| <All variables> | 0.69549                  |  |  |  |

|                       |           |         |        |         |
|-----------------------|-----------|---------|--------|---------|
| + FI                  | 0.661776  |         |        |         |
| + BIX                 | 0.6588105 |         |        |         |
| + SUVA <sub>254</sub> | 0.6521977 |         |        |         |
| <none>                | 0.6414914 |         |        |         |
|                       | Df        | AIC     | F      | Pr(>F)  |
| + FI                  | 1         | -566.35 | 6.5176 | 0.007** |

**Step: R<sup>2</sup>.adj = 0.661776**

Call: EEM\_hel ~ HIX + S<sub>R</sub> + A<sub>254</sub> + FI

|                       |                          |         |        |        |
|-----------------------|--------------------------|---------|--------|--------|
|                       | R <sup>2</sup> .adjusted |         |        |        |
| <All variables>       | 0.69549                  |         |        |        |
| + BIX                 | 0.680472                 |         |        |        |
| + SUVA <sub>254</sub> | 0.6667591                |         |        |        |
| <none>                | 0.661776                 |         |        |        |
|                       | Df                       | AIC     | F      | Pr(>F) |
| + BIX                 | 1                        | -570.87 | 6.3246 | 0.011* |

**Step: R<sup>2</sup>.adj = 0.680472**

Call: EEM\_hel ~ HIX + S<sub>R</sub> + A<sub>254</sub> + FI + BIX

|                       |                          |         |        |        |
|-----------------------|--------------------------|---------|--------|--------|
|                       | R <sup>2</sup> .adjusted |         |        |        |
| <All variables>       | 0.69549                  |         |        |        |
| + SUVA <sub>254</sub> | 0.69549                  |         |        |        |
| <none>                | 0.680472                 |         |        |        |
|                       | Df                       | AIC     | F      | Pr(>F) |
| + SUVA <sub>254</sub> | 1                        | -574.56 | 5.4387 | 0.016* |

**Step: R<sup>2</sup>.adj = 0.69549**

Call: EEM\_hel ~ HIX + S<sub>R</sub> + A<sub>254</sub> + FI + BIX + SUVA<sub>254</sub>

293 Signif. codes: 0 '\*\*\*' 0.001 '\*\*' 0.01 '\*' 0.05 '.' 0.1 ' ' 1

294

295

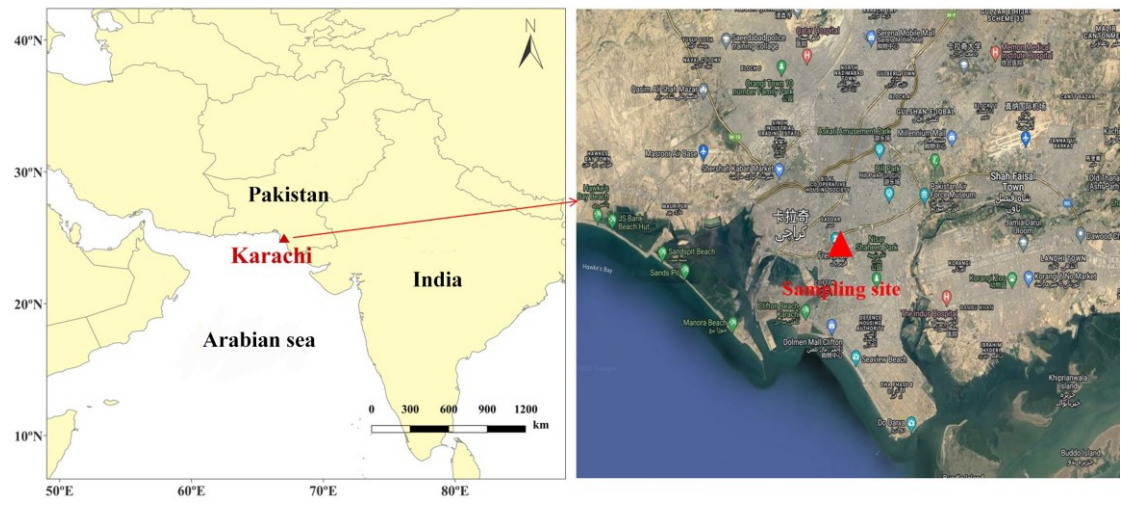

296

297

298

299

**Figure S1.** Detailed location of sampling site in this study. The satellite image at the right was derived from Google Maps (Image © Google Maps 2019).

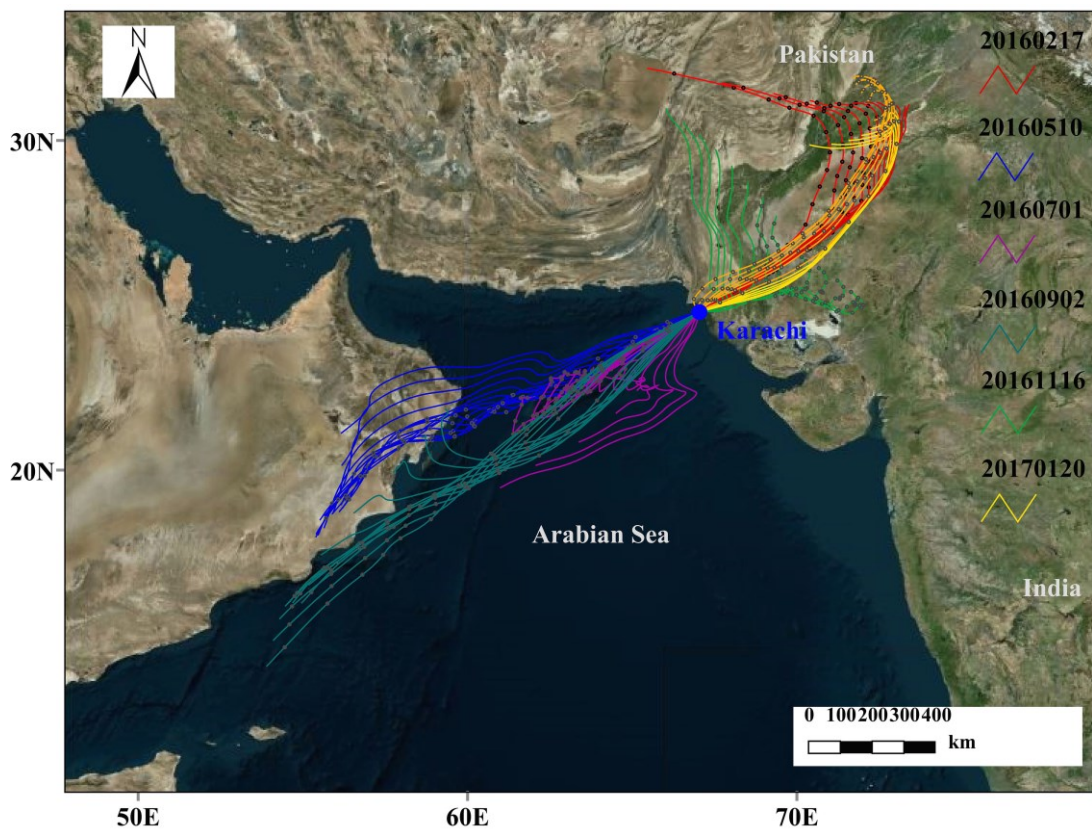

300

301 **Figure S2.** The 72 h back air-mass trajectories at Karachi from Pakistan for the selected samples  
 302 via FT-ICR MS analysis on February 16, May 10, July 1, September 2, November 16, 2016, and  
 303 January 20, 2017, correspond to different seasons. The trajectories with black dots represent the  
 304 corresponding night, otherwise, it is the day. The air-mass trajectories were analyzed by the  
 305 HYSPLIT model. The base map was derived from Bing Maps (© 2023 Microsoft).

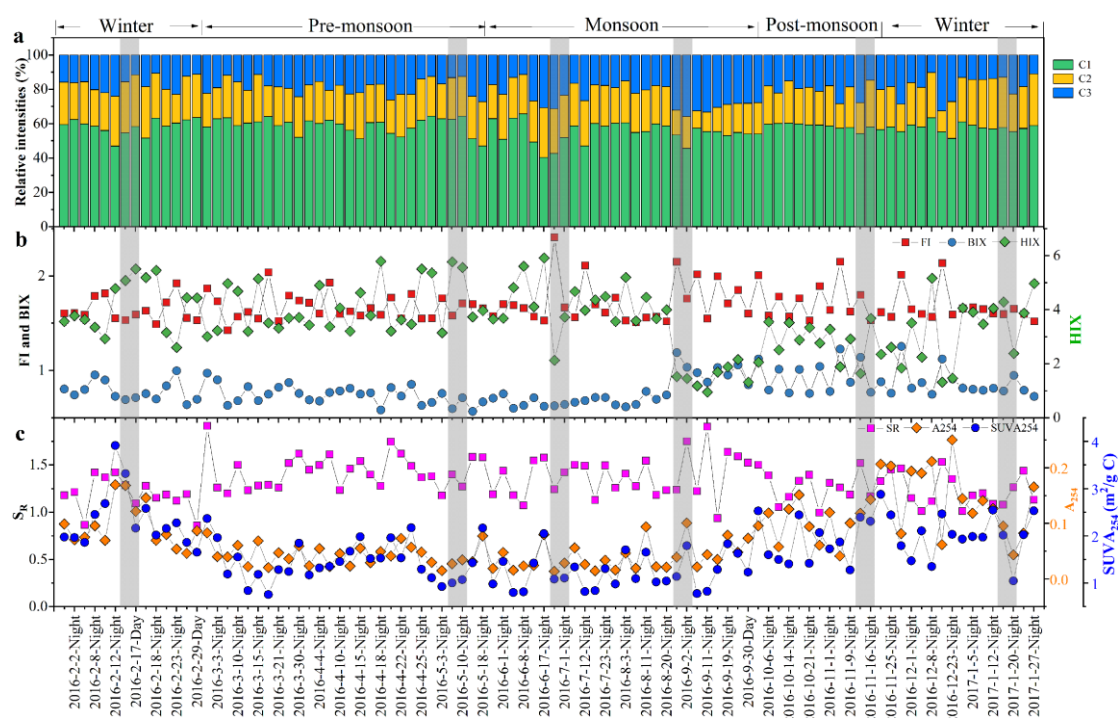

307

308

**Figure S3.** The relative abundances of PARAFAC components (C1, C2, and C3), **a**; the fluorescence index (FI), biological index (BIX), humification index (HIX) values, **b**; and the spectra slope ( $S_R$ ), absorption at 254 nm ( $A_{254}$ ), specific ultraviolet absorbance at 254 nm ( $SUVA_{254}$ ), **c**; in the WSOC over Karachi, Pakistan. The shade regions refer to the selected samples for FT-ICR MS analysis.

310

311

312



313

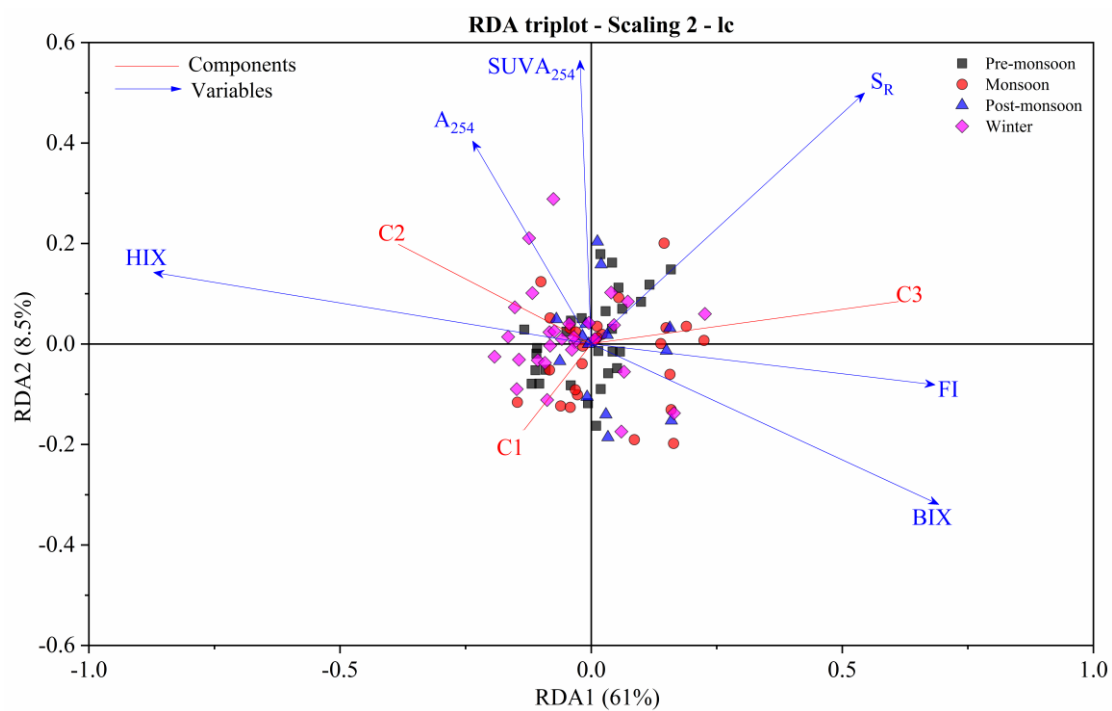

314

315 **Figure S4.** RDA triplot in Scaling 2, Hellinger-transformed PARAFAC component (red line)  
316 constrained by significant six optical parameters variables (blue arrow) ( $p < 0.01$ ). The dots  
317 represent the fitted site scores, and different colored dots refer to season variables.

318

319

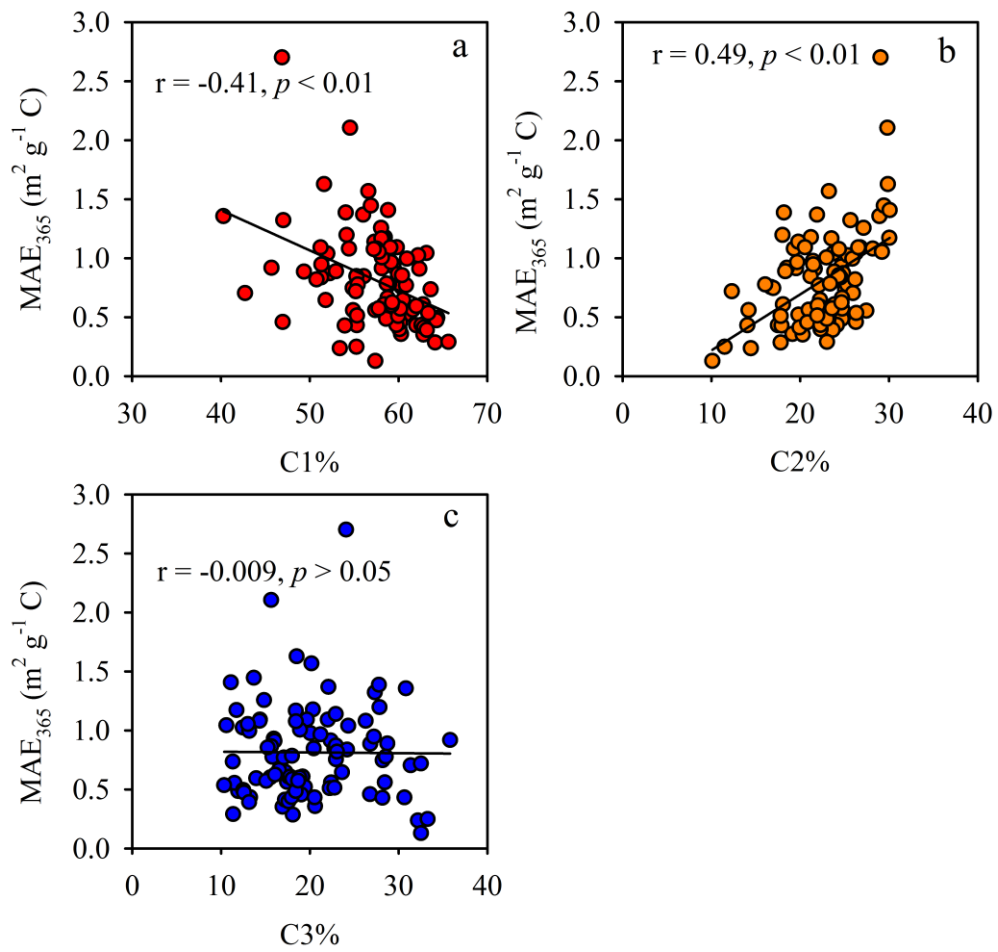

320

321 **Figure S5.** Correlation of MAE<sub>365</sub> and relative abundance of PARAFAC components (C1–3, a–c).

322

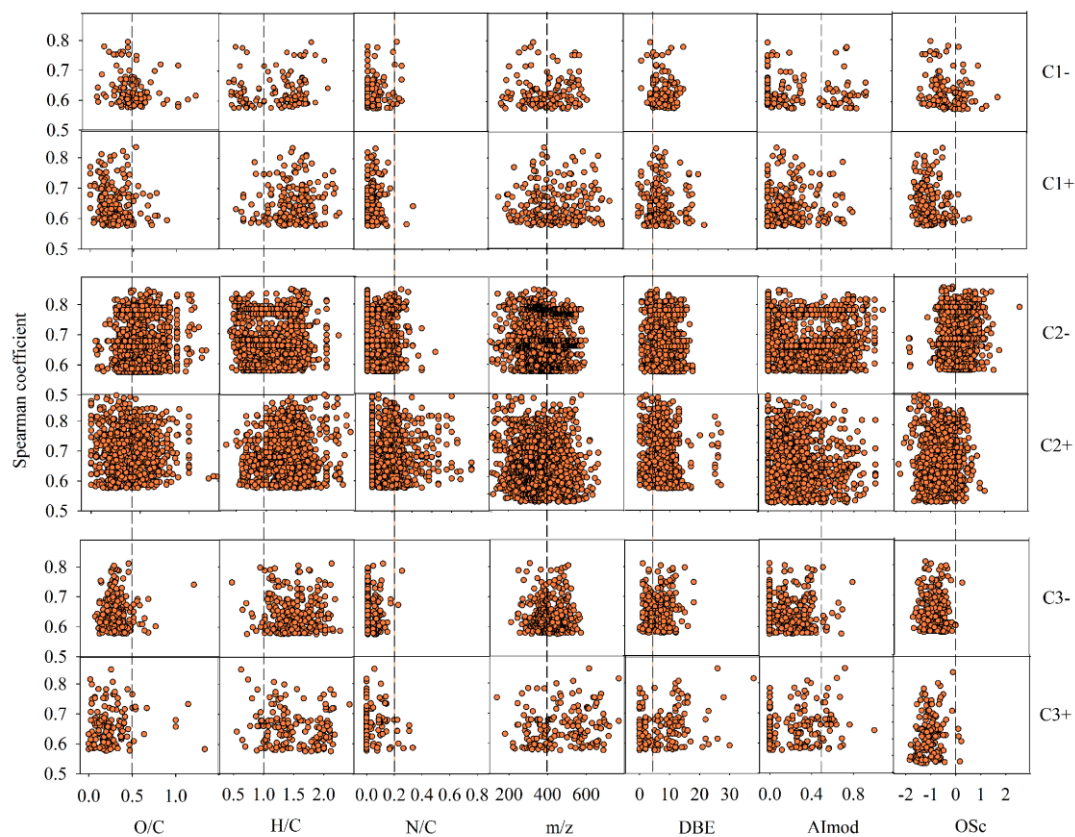

323

324 **Figure S6.** The strength and spread of significant Spearman correlations ( $r_s > 0.57$ ;  $p < 0.05$ ) along  
 325 compositional gradients for each fluorescence component (C1, C2, and C3). The dashed line, for  
 326 reference, is located at O/C = 0.5, H/C = 1.0, N/C=0.2, m/z = 400, DBE = 4, AI<sub>mod</sub> = 0.5, and carbon  
 327 oxidation state (OSc) = 0.

328

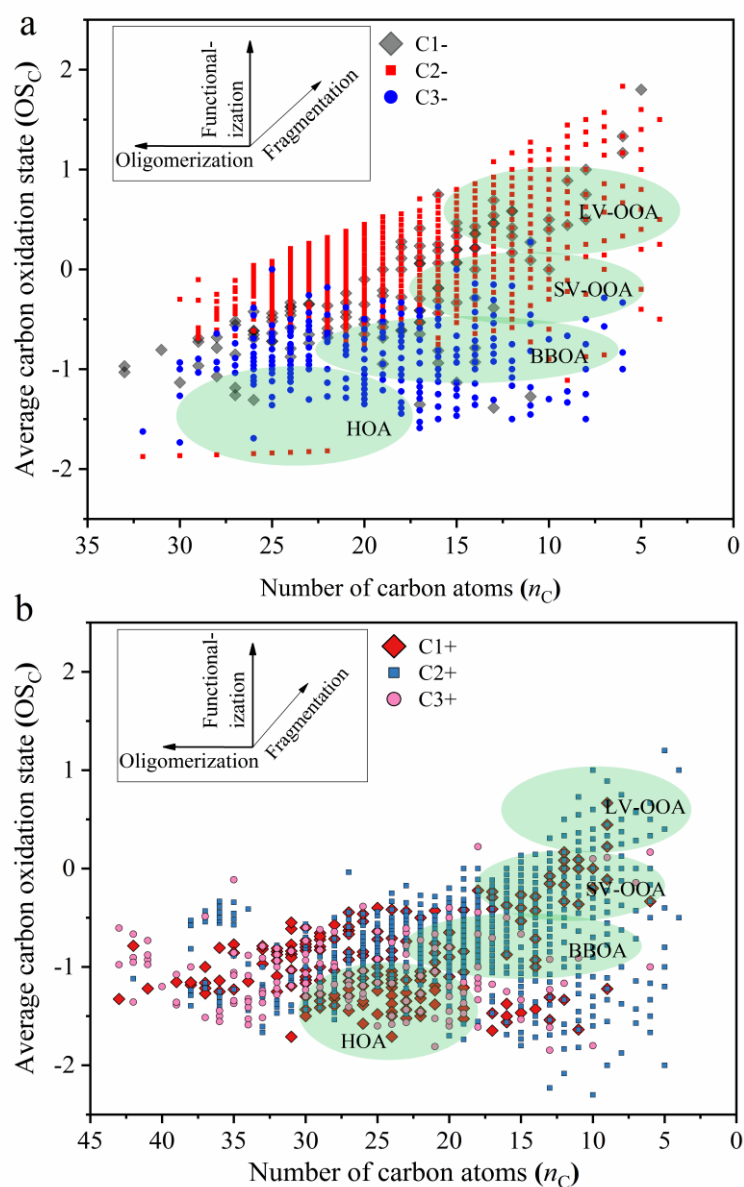

330

331 **Figure S7.** Location in  $n_C-OS_C$  space of fluorescent components-assigned molecular formulas  
 332 determined by FT-ICR MS. The range in black circles indicated locations of different organic  
 333 aerosol classes (Kroll et al., 2011). Hydrocarbon-like organic aerosol (HOA) and biomass-burning  
 334 organic aerosol (BBOA) correspond to primary particulate matter directly emitted into the  
 335 atmosphere. Semi-volatile and low-volatility oxidized organic aerosol (SV-OOA and LV-OOA)  
 336 correspond to ‘fresh’ and ‘aged’ secondary aerosol. Inset: vectors corresponding to key classes of  
 337 reactions of atmospheric organics: functionalization (addition of polar functional groups),  
 338 fragmentation (cleavage of C–C bonds), and oligomerization (covalent association of two organic  
 339 species).

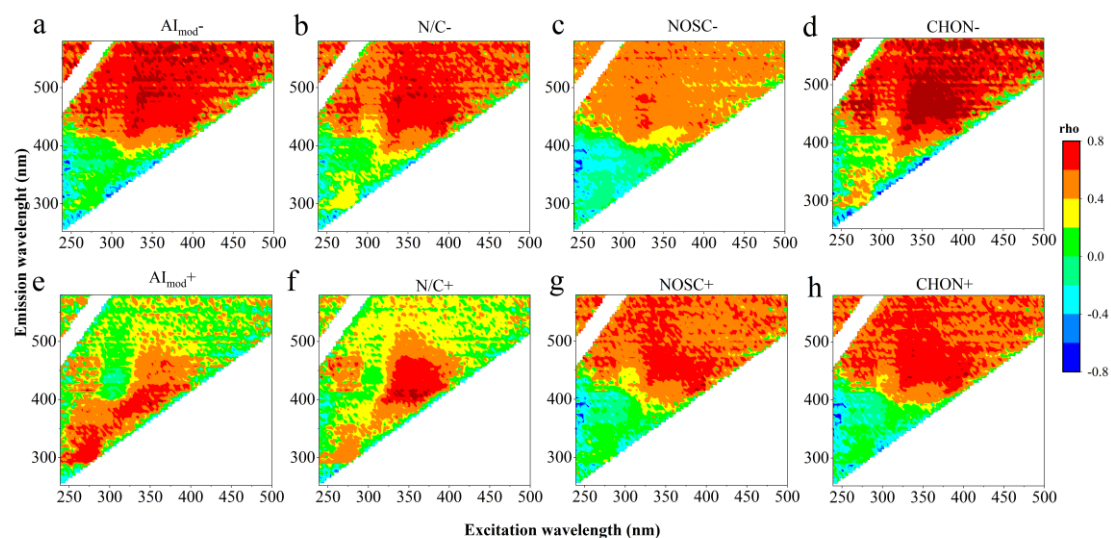

340

341

**Figure S8.** Relationships between the normalized fluorescence intensity at each excitation-emission pair and molecular-level derived compositional characteristics. Spearman correlations were calculated between the fluorescence intensity normalized to the total fluorescence intensity at each excitation-emission wavelength pair and the intensity-weighted average of molecular characteristics derived from FT-ICR-MS detected compounds. Molecular characteristics included  $AI_{mod}$ , N/C, NOSC, and CHON.  $AI_{mod-}$  and  $AI_{mod+}$  refer to the aromaticity index of compounds detected in the ESI<sup>-</sup> and ESI<sup>+</sup> modes, respectively, and the others are defined similarly. Associations with  $\rho > 0.57$  were considered significant (t-test).

349

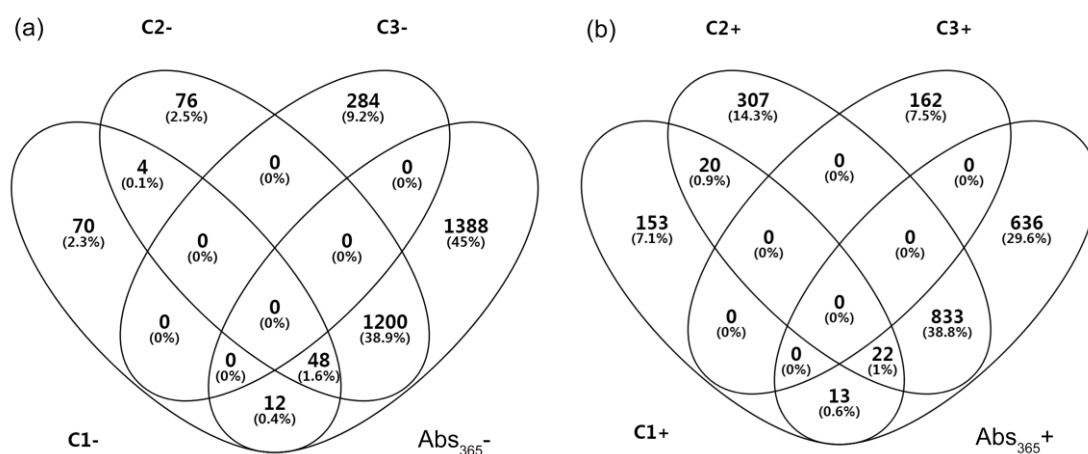

351

352 **Figure S9.** Venn diagrams of C1–3- and BrC-assigned formulas in the ESI- (a) and ESI+ (b) modes,  
 353 respectively. The areas of overlap are the common elements in both, three, and four species. The  
 354 BrC-assigned formulas were obtained similarly to that of PARAFAC components. Note that we  
 355 selected the light absorption coefficient at 365 nm (Abs<sub>365</sub>, detail in Text S2) as a proxy of BrC,  
 356 because of the light absorption coefficient at other wavelengths (250 nm, 280 nm, 400 nm, 500 nm,  
 357 and 550 nm) were strongly correlated with Abs<sub>365</sub> ( $r = 0.98\sim 0.99$ ,  $p < 0.000$ ).  
 358

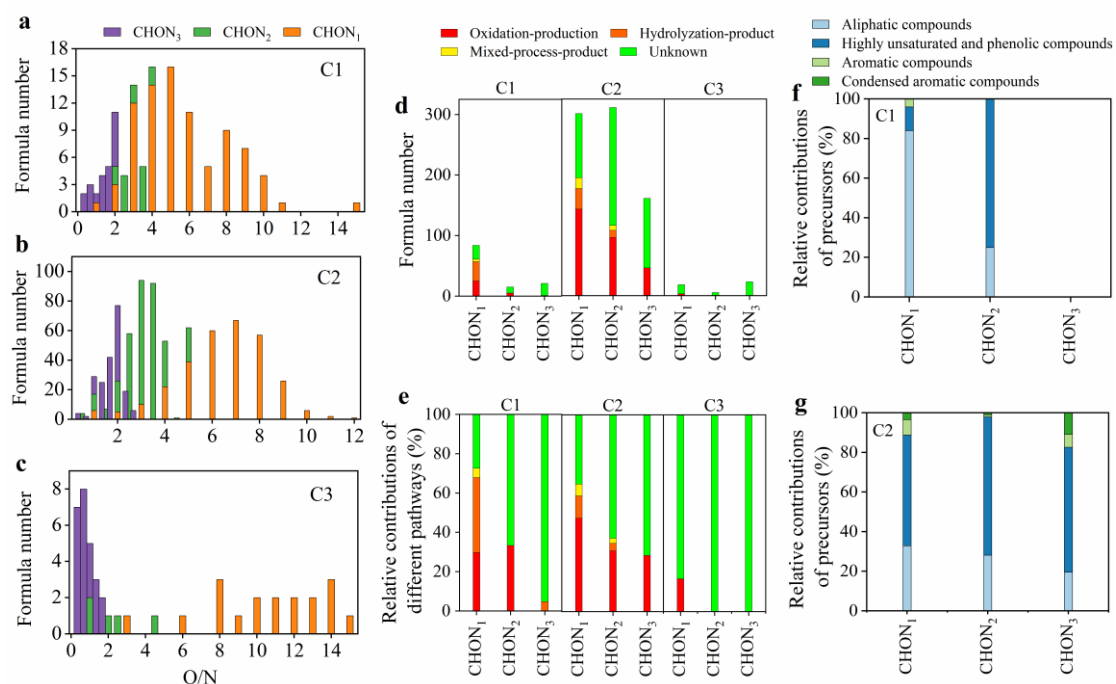

359

360

**Figure S10.** O/N ratios distribution of CHON+ compounds assigned to C1 (a), C2 (b), and C3 (c),

361

and the corresponding formula number distribution of different pathways for CHON+ molecules

362

assigned to C1–3 (d) and the relative contributions of different pathways (e). In addition, panels (f)

363

and (g) refer to the relative contributions of precursor types to the oxidation-product pair for CHON<sub>1</sub>-

364

CHON<sub>2</sub> of C1 and C2, respectively.

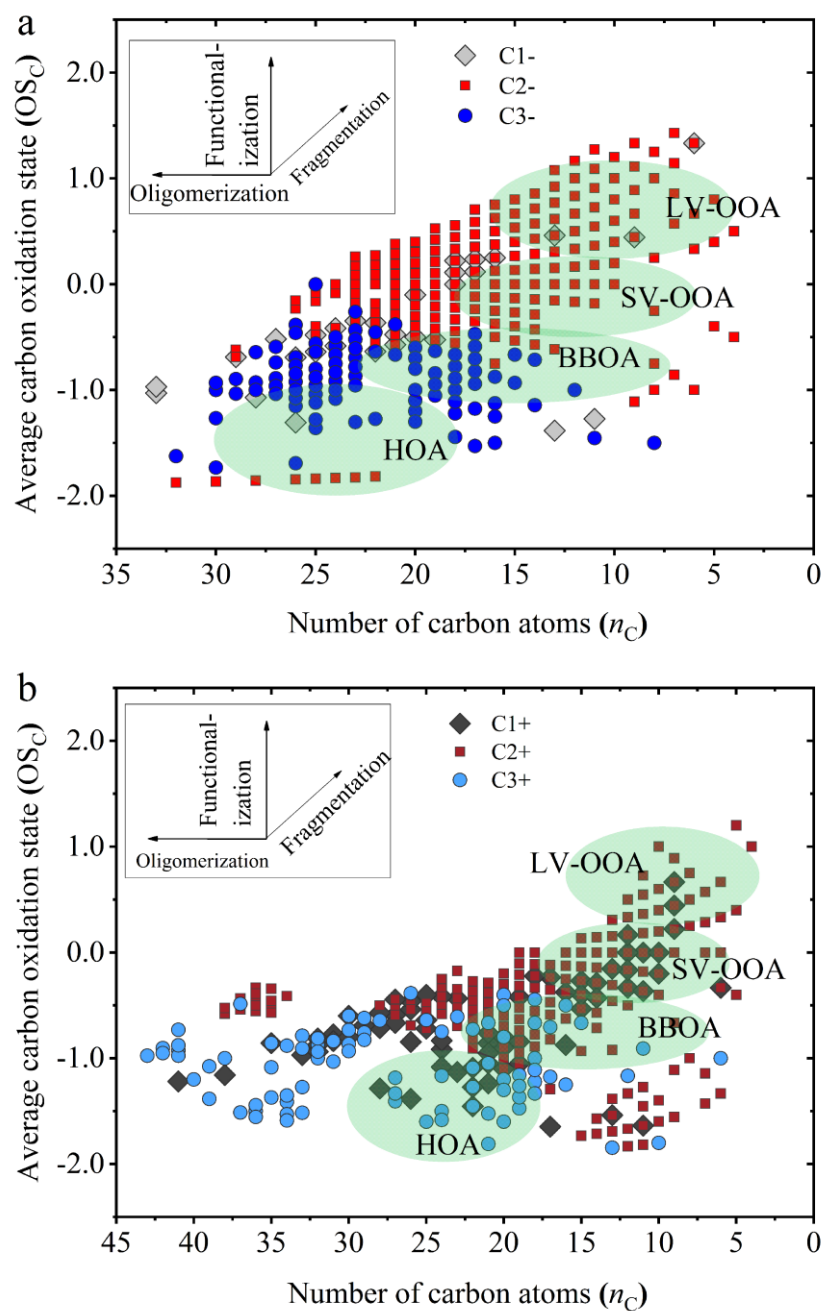

365  
366  
367

**Figure S11.** Location in  $n_C$ - $\overline{OS}_C$  space of CHO compounds assigned to PARAFAC components.



368  
369

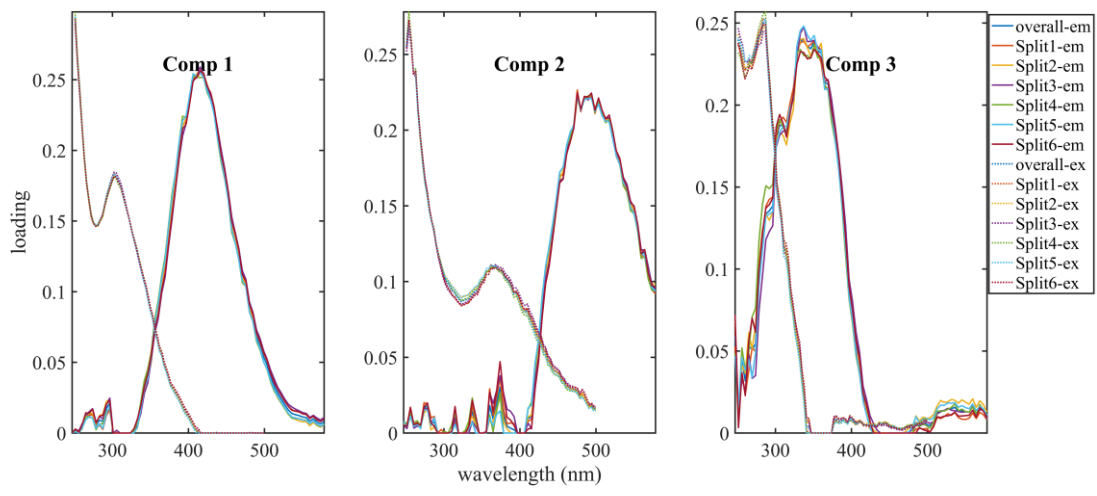

370  
371  
372

**Figure S12.** Split-half analysis of 3-component PARAFAC model with the split style 'S<sub>4</sub>C<sub>6</sub>T<sub>3</sub>' for all EEMs of WSOC from Karachi, Pakistan.

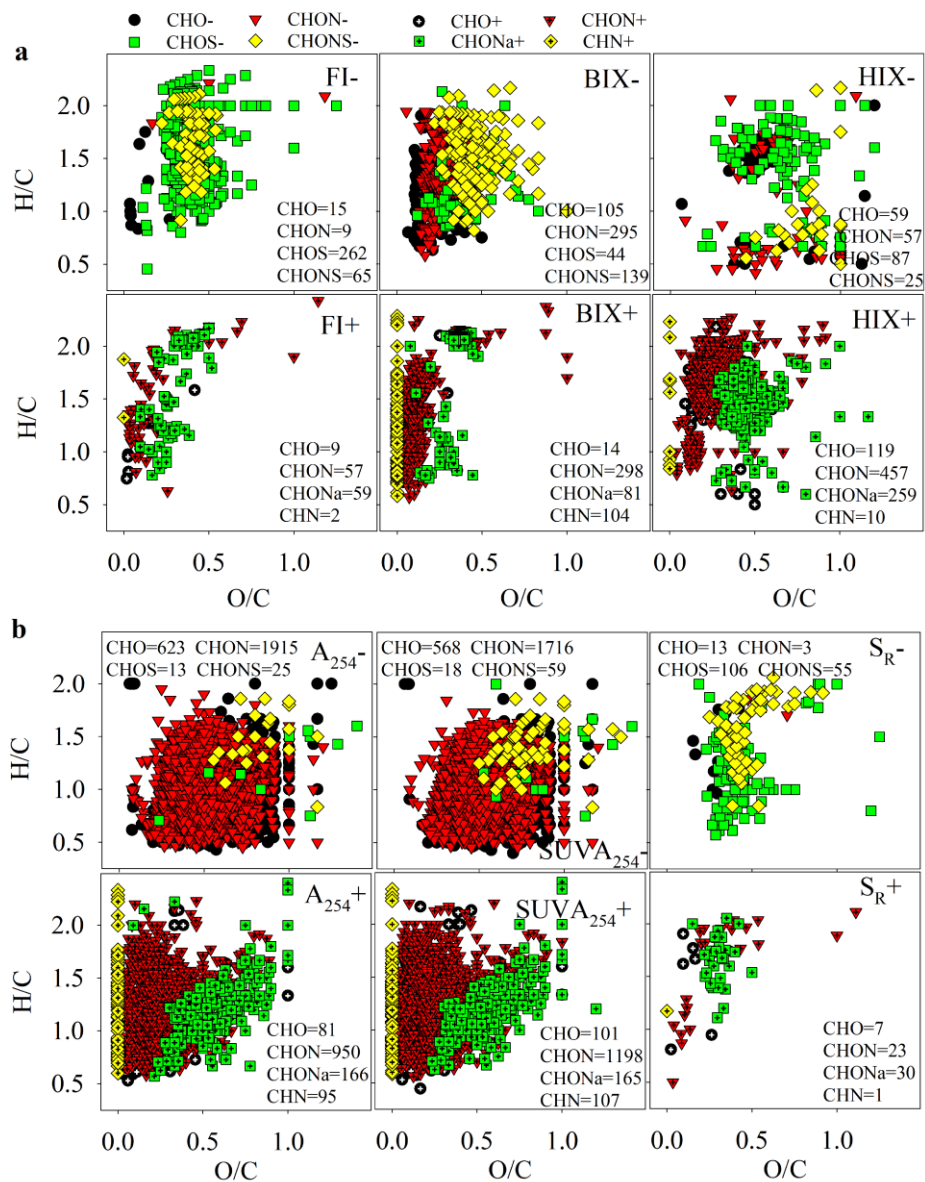

373

374 **Figure S13.** van Krevelen diagrams of FT-ICR MS-identified compounds assigned to fluorescent

375 indices (FI, BIX, and HIX, **a**), and light absorption indices (A<sub>254</sub>, SUVA<sub>254</sub>, and S<sub>R</sub>, **b**), respectively.

376 FI- and FI+ refer to the molecules that are assigned to FI in the ESI- and ESI+ mode, respectively,

377 and the others are defined analogously.

378

379

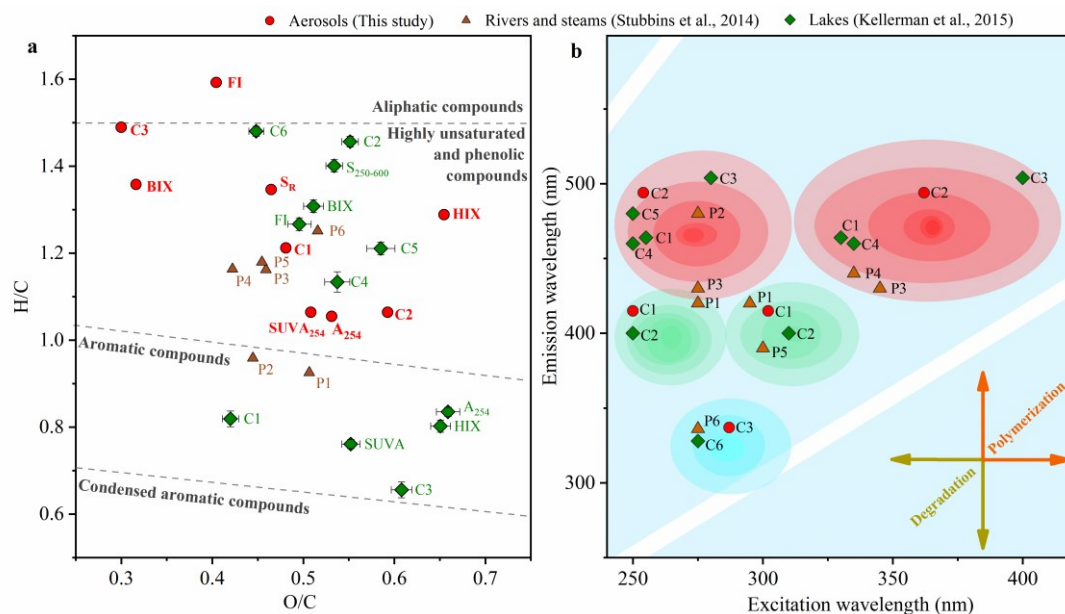

380

381 **Figure S14.** (a) Comparison of average chemical characteristics of molecules assigned to C1, C2,  
 382 and C3, as well as optical indices of WSOC in the aerosols (marked as a red dot), DOM from rivers  
 383 and streams (brown triangle, fluorescent component P1–6) and lakes (green diamond, fluorescent  
 384 component C1–6, and FI, BIX, HIX, SUVA, A<sub>254</sub>, and S<sub>250-600</sub>); (b) the corresponding excitation and  
 385 emission maxima in the EEM spectra (Stubbins et al., 2014; Kellerman et al., 2015). Note that the  
 386 fluorescent components associated with molecular data (a) of DOM in rivers and streams were re-  
 387 extracted from its supplement and the error bars were not shown. The error bars in this study were  
 388 shown in Table S3. The range of the red circle, green circle, and blue circle (b) represent the range  
 389 of HULIS-1, HULIS-2, and PLOM fluorescence, respectively, and the arrows indicate  
 390 polymerization and degradation defined according to the study (Chen et al., 2016).

391

- 393 Bahram, M., Bro, R., Stedmon, C., and Afkhami, A.: Handling of Rayleigh and Raman scatter for  
394 PARAFAC modeling of fluorescence data using interpolation, *J. Chemom.*, 20, 99-105,  
395 <https://doi.org/10.1002/cem.978>, 2006.
- 396 Chen, Q., Miyazaki, Y., Kawamura, K., Matsumoto, K., Coburn, S., Volkamer, R., Iwamoto, Y.,  
397 Kagami, S., Deng, Y., Ogawa, S., Ramasamy, S., Kato, S., Ida, A., Kajii, Y., and Mochida, M.:  
398 Characterization of Chromophoric Water-Soluble Organic Matter in Urban, Forest, and Marine  
399 Aerosols by HR-ToF-AMS Analysis and Excitation-Emission Matrix Spectroscopy, *Environ.*  
400 *Sci. Technol.*, 50, 10351-10360, <https://doi.org/10.1021/acs.est.6b01643>, 2016.
- 401 Helms, J. R., Stubbins, A., Ritchie, J. D., Minor, E. C., Kieber, D. J., and Mopper, K.: Absorption  
402 spectral slopes and slope ratios as indicators of molecular weight, source, and photobleaching  
403 of chromophoric dissolved organic matter, *Limnol. Oceanogr.*, 53, 955-969,  
404 <https://doi.org/10.4319/lo.2008.53.3.0955>, 2008.
- 405 Huguet, A., Vacher, L., Relexans, S., Saubusse, S., Froidefond, J. M., and Parlanti, E.: Properties of  
406 fluorescent dissolved organic matter in the Gironde Estuary, *Org. Geochem.*, 40, 706-719,  
407 <https://doi.org/10.1016/j.orggeochem.2009.03.002>, 2009.
- 408 Jiang, H., Tang, J., Li, J., Zhao, S., Mo, Y., Tian, C., Zhang, X., Jiang, B., Liao, Y., Chen, Y., and  
409 Zhang, G.: Molecular Signatures and Sources of Fluorescent Components in Atmospheric  
410 Organic Matter in South China, *Environ. Sci. Technol. Lett.*, 9, 913-920,  
411 <https://doi.org/10.1021/acs.estlett.2c00629>, 2022.
- 412 Kellerman, A. M., Kothawala, D. N., Dittmar, T., and Tranvik, L. J.: Persistence of dissolved organic  
413 matter in lakes related to its molecular characteristics, *Nat. Geosci.*, 8, 454-U452,  
414 <https://doi.org/10.1038/ngeo2440>, 2015.
- 415 Koch, B., and Dittmar, T.: Koch, B. P. & Dittmar, T. From mass to structure: An aromaticity index  
416 for high-resolution mass data of natural organic matter. *Rapid Commun. Mass Spectrom.* 20,  
417 926-932, *Rapid Commun. Mass Spectrom.*, 20, 926-932, <https://doi.org/10.1002/rcm.2386>,  
418 2006.
- 419 Kothawala, D. N., Murphy, K. R., Stedmon, C. A., Weyhenmeyer, G. A., and Tranvik, L. J.: Inner  
420 filter correction of dissolved organic matter fluorescence, *Limnology and Oceanography*:  
421 *Methods*, 11, 616-630, <https://doi.org/10.4319/lom.2013.11.616>, 2013.
- 422 Kroll, J. H., Donahue, N. M., Jimenez, J. L., Kessler, S. H., Canagaratna, M. R., Wilson, K. R.,  
423 Altieri, K. E., Mazzoleni, L. R., Wozniak, A. S., Bluhm, H., Mysak, E. R., Smith, J. D., Kolb,  
424 C. E., and Worsnop, D. R.: Carbon oxidation state as a metric for describing the chemistry of  
425 atmospheric organic aerosol, *Nat. Chem.*, 3, 133-139, <https://doi.org/10.1038/nchem.948>, 2011.
- 426 Kundu, S., Fisseha, R., Putman, A. L., Rahn, T. A., and Mazzoleni, L. R.: High molecular weight  
427 SOA formation during limonene ozonolysis: insights from ultrahigh-resolution FT-ICR mass  
428 spectrometry characterization, *Atmos. Chem. Phys.*, 12, 5523-5536,  
429 <https://doi.org/10.5194/acp-12-5523-2012>, 2012.
- 430 Lawaetz, A. J., and Stedmon, C. A.: Fluorescence intensity calibration using the Raman scatter peak  
431 of water, *Appl. Spectrosc.*, 63, 936-940, <https://doi.org/10.1366/000370209788964548>, 2009.
- 432 Lee, H. J., Laskin, A., Laskin, J., and Nizkorodov, S. A.: Excitation-emission spectra and

433 fluorescence quantum yields for fresh and aged biogenic secondary organic aerosols, *Environ.*  
434 *Sci. Technol.*, 47, 5763-5770, <https://doi.org/10.1021/es400644c>, 2013.

435 Li, M., Fan, X., Zhu, M., Zou, C., Song, J., Wei, S., Jia, W., and Peng, P.: Abundances and light  
436 absorption properties of brown carbon emitted from residential coal combustion in China,  
437 *Environ. Sci. Technol.*, 53, 595-603, <https://doi.org/10.1021/acs.est.8b05630>, 2018.

438 Lin, P., Huang, X.-F., He, L.-Y., and Zhen Yu, J.: Abundance and size distribution of HULIS in  
439 ambient aerosols at a rural site in South China, *J. Aerosol Sci.*, 41, 74-87,  
440 <https://doi.org/10.1016/j.jaerosci.2009.09.001>, 2010.

441 Lin, P., Rincon, A. G., Kalberer, M., and Yu, J. Z.: Elemental composition of HULIS in the Pearl  
442 River Delta Region, China: results inferred from positive and negative electrospray high  
443 resolution mass spectrometric data, *Environ. Sci. Technol.*, 46, 7454-7462,  
444 <https://doi.org/10.1021/es300285d>, 2012.

445 Lv, J., Zhang, S., Luo, L., and Cao, D.: Solid-phase extraction-stepwise elution (SPE-SE) procedure  
446 for isolation of dissolved organic matter prior to ESI-FT-ICR-MS analysis, *Anal. Chim. Acta.*,  
447 948, 55-61, <https://doi.org/10.1016/j.aca.2016.10.038>, 2016.

448 Mo, Y., Zhong, G., Li, J., Liu, X., Jiang, H., Tang, J., Jiang, B., Liao, Y., Cheng, Z., and Zhang, G.:  
449 The Sources, Molecular Compositions, and Light Absorption Properties of Water - Soluble  
450 Organic Carbon in Marine Aerosols From South China Sea to the Eastern Indian Ocean, *J.*  
451 *Geophys. Res.-Atmos.*, 127, <https://doi.org/10.1029/2021jd036168>, 2022.

452 Murphy, K. R., Stedmon, C. A., Graeber, D., and Bro, R.: Fluorescence spectroscopy and multi-way  
453 techniques. PARAFAC, *Anal. Methods*, 5, 6557-6566, <https://doi.org/10.1039/c3ay41160e>,  
454 2013.

455 Murphy, K. R., Timko, S. A., Gonsior, M., Powers, L. C., Wunsch, U. J., and Stedmon, C. A.:  
456 Photochemistry Illuminates Ubiquitous Organic Matter Fluorescence Spectra, *Environ. Sci.*  
457 *Technol.*, 52, 11243-11250, <https://doi.org/10.1021/acs.est.8b02648>, 2018.

458 Oksanen, J., Simpson, G. L., Blanchet, F. G., Kindt, R., Legendre, P., Minchin, P. R., O'Hara, R.,  
459 Solymos, P., Stevens, M. H. H., and Szoecs, E.: Package 'vegan'. R-package version 2.6-2.  
460 <https://CRAN.R-project.org/package=vegan> (accessed April 17, 2022), 2022.

461 Ramette, A.: Multivariate analyses in microbial ecology, *FEMS Microbiol. Ecol.*, 62, 142-160,  
462 <https://doi.org/10.1111/j.1574-6941.2007.00375.x>, 2007.

463 Siemens, K., Morales, A., He, Q., Li, C., Hettiyadura, A. P. S., Rudich, Y., and Laskin, A.: Molecular  
464 Analysis of Secondary Brown Carbon Produced from the Photooxidation of Naphthalene,  
465 *Environ. Sci. Technol.*, 56, 3340-3353, <https://doi.org/10.1021/acs.est.1c03135>, 2022.

466 Singer, G. A., Fasching, C., Wilhelm, L., Niggemann, J., Steier, P., Dittmar, T., and Battin, T. J.:  
467 Biogeochemically diverse organic matter in Alpine glaciers and its downstream fate, *Nat.*  
468 *Geosci.*, 5, 710-714, <https://doi.org/10.1038/ngeo1581>, 2012.

469 Smith, J. S., Laskin, A., and Laskin, J.: Molecular Characterization of Biomass Burning Aerosols  
470 Using High-Resolution Mass Spectrometry, *Anal. Chem.*, 81, 1512-1521,  
471 <https://doi.org/10.1021/ac8020664>, 2009.

472 Stubbins, A., Lapierre, J. F., Berggren, M., Prairie, Y. T., Dittmar, T., and del Giorgio, P. A.: What's  
473 in an EEM? Molecular signatures associated with dissolved organic fluorescence in boreal  
474 Canada, *Environ. Sci. Technol.*, 48, 10598-10606, <https://doi.org/10.1021/es502086e>, 2014.

475 Twardowski, M. S., Boss, E., Sullivan, J. M., and Donaghay, P. L.: Modeling the spectral shape of  
476 absorption by chromophoric dissolved organic matter, *Mar. Chem.*, 89, 69-88,  
477 <https://doi.org/10.1016/j.marchem.2004.02.008>, 2004.

478 Varga, B., Kiss, G., Ganszky, I., Gelencsér, A., and Krivácsy, Z.: Isolation of water-soluble organic  
479 matter from atmospheric aerosol, *Talanta*, 55, 561-572, [https://doi.org/10.1016/S0039-](https://doi.org/10.1016/S0039-9140(01)00446-5)  
480 9140(01)00446-5, 2001.

481 Weishaar, J. L., Aiken, G. R., Bergamaschi, B. A., Fram, M. S., Fujii, R., and Mopper, K.: Evaluation  
482 of Specific Ultraviolet Absorbance as an Indicator of the Chemical Composition and Reactivity  
483 of Dissolved Organic Carbon, *Environ. Sci. Technol.*, 37, 4702-4708,  
484 <https://doi.org/10.1021/es030360x>, 2003.

485 Wu, G., Fu, P., Ram, K., Song, J., Chen, Q., Kawamura, K., Wan, X., Kang, S., Wang, X., Laskin,  
486 A., and Cong, Z.: Fluorescence characteristics of water-soluble organic carbon in atmospheric  
487 aerosol, *Environ. Pollut.*, 268, 115906, <https://doi.org/10.1016/j.envpol.2020.115906>, 2021.

488 Yan, C., Zheng, M., Sullivan, A. P., Bosch, C., Desyaterik, Y., Andersson, A., Li, X., Guo, X., Zhou,  
489 T., Gustafsson, Ö., and Collett, J. L.: Chemical characteristics and light-absorbing property of  
490 water-soluble organic carbon in Beijing: Biomass burning contributions, *Atmos. Environ.*, 121,  
491 4-12, <https://doi.org/10.1016/j.atmosenv.2015.05.005>, 2015.

492 Yu, L., Smith, J., Laskin, A., Anastasio, C., Laskin, J., and Zhang, Q.: Chemical characterization of  
493 SOA formed from aqueous-phase reactions of phenols with the triplet excited state of carbonyl  
494 and hydroxyl radical, *Atmos. Chem. Phys.*, 14, 13801-13816, [https://doi.org/10.5194/acp-14-](https://doi.org/10.5194/acp-14-13801-2014)  
495 13801-2014, 2014.

496 Zong, Z., Tian, C., Li, J., Syed, J. H., Zhang, W., Fang, Y., Jiang, Y., Nasir, J., Mansha, M., Rizvi, S.  
497 H. H., Shafiq, M., Farhan, S. B., and Zhang, G.: Isotopic Interpretation of Particulate Nitrate  
498 in the Metropolitan City of Karachi, Pakistan: Insight into the Oceanic Contribution to NO<sub>x</sub>,  
499 *Environ. Sci. Technol.*, 54, 7787-7797, <https://doi.org/10.1021/acs.est.0c00490>, 2020.

500 Zsolnay, A., Baigar, E., Jimenez, M., Steinweg, B., and Saccomandi, F.: Differentiating with  
501 fluorescence spectroscopy the sources of dissolved organic matter in soils subjected to drying,  
502 *Chemosphere*, 38, 45-50, [https://doi.org/10.1016/S0045-6535\(98\)00166-0](https://doi.org/10.1016/S0045-6535(98)00166-0), 1999.

503
