# Supplementary material for: Molecular signatures and formation mechanisms of particulate matter (PM) water-soluble chromophores from Karachi (Pakistan) over South Asia
Source: Copernicus journal article supplement (doi:10.5194/egusphere-2023-403), 2023-03-29
Supplement: Supplementary file [file egusphere-2023-403-AC1-supplement.pdf]

22 Thanks to the anonymous reviewer for their constructive comments on the manuscript  
23 and helpful suggestions for further improvement. Please find detailed responses below  
24 in blue-color font.

25

## 26 **Response to Anonymous Referee #1**

27

### 28 **Summary**

29 In this preprint, the authors utilized excitation-emission matrix (EEM) fluorescence  
30 spectroscopy and Fourier transform ion cyclotron resonance mass spectrometry (FT-  
31 ICR MS) to examine the molecular composition and formation mechanisms of water-  
32 soluble organic carbon (WSOC) in atmospheric aerosols gathered from Karachi,  
33 Pakistan. They identified three parallel factor (PARAFAC) components, consisting of  
34 two humic-like (C1 and C2) and one protein-like (C3). They further investigated the  
35 connection between PARAFAC components and possible brown carbon (BrC)  
36 fluorescent species, along with absorbance characteristics, which could aid in  
37 broadening our knowledge of BrC in the atmosphere. With a few adjustments,  
38 clarifications, and a thorough language revision for clarity, this study has the potential  
39 to contribute to the field and be suitable for publication in ACP.

40 [Response: Thank you for appreciating our work and providing valuable suggestions.](#)  
41 [We have obtained professional language editing and have revised the manuscript](#)  
42 [according to your comments. The revised sections are highlighted for easy reference.](#)

43

### 44 **Strengths**

45 The authors leveraged a blend of advanced analytical techniques, such as EEM  
46 spectroscopy and FT-ICR MS, to characterize WSOC in aerosols.

47

48 By identifying three PARAFAC components and examining their molecular  
49 relationships, the study provides a more in-depth understanding of the formation  
50 processes and properties of fluorescent species in the atmosphere.

51

52 The insights gained on the molecular compositions and formation mechanisms of  
53 atmospheric fluorescent components can prove valuable for future investigations that  
54 employ EEM-PARAFAC to study atmospheric BrC.

55 [Response: We are grateful to the reviewer for recognizing our work and providing](#)  
56 [valuable suggestions. The suggestions would help us improve the manuscript.](#)

57

### 58 **Areas for improvement**

59 The study focuses on aerosols from Karachi, Pakistan, so the conclusions might not  
60 represent other geographical areas. Although there are comparisons with results from  
61 Bakersfield and Guangzhou (among others), it would be beneficial for the authors to  
62 critically discuss the broad applicability of their overall findings to other locations in  
63 the conclusion, or suggest future studies using their methodologies to include aerosols  
64 from diverse regions.

65 Response: Thanks. This study investigated the molecular compositions and formation  
66 pathways of water-soluble PARAFAC components in this interesting geographical  
67 location in Karachi, Pakistan. Our findings can potentially be applied to other locations,  
68 highlighting two main aspects. First, we obtain the molecular characteristics of  
69 PARAFAC components that are consistent with their emission wavelength maximum.  
70 The trend of DBE, O/C,  $\overline{OS}_C$ , and  $AI_{mod}$  of molecular compounds assigned to C1–3 is  
71 as follows: C2 (494 nm) > C1 (415 nm) > C3 (337 nm). Similar patterns were observed  
72 in the molecular formulas of humic-like components compared to those of protein-like  
73 components in Guangzhou, a city in southern China by He et al. (2023). These findings  
74 suggest that the maximum emission wavelength of fluorescent components may serve  
75 as an indicator of the chemical characteristics of BrC chromophores, such as the level  
76 of unsaturation and oxidation. Second, the pathway of oxidation formation was  
77 identified as an important process for the formation of C1 and C2. This is specific to  
78 their assigned CHON compounds. The deduced  $N_2O_5$  oxidation reaction, which formed  
79 organic nitrates, accounts for a significant fraction of CHON compounds assigned to  
80 C1 and C2. While C2 has more precursors of aromatic/condensed aromatic compounds  
81 for CHON compared to C1, suggesting that this component contains more nitro-  
82 aromatic compounds. Furthermore, C2 is assigned a large number of compounds that  
83 match the “potential BrC” region and overlap with BrC-associated formulas and  
84 exhibits a close correlation with  $MAE_{365}$ . Taken together, these findings imply that a  
85 group of compounds that contribute to C2 fluorescence may significantly contribute to  
86 the light absorption of BrC. According to these findings, we inferred that this  
87 component likely represents a class of strongly absorbing substances, specifically nitro-  
88 aromatic compounds. More discussions were shown in lines 820-897 in the revised  
89 manuscript.

90

91 In Section 3.3, the authors attempt to explain the differences in oxidation pathways  
92 (depending on precursor types) for the formation of C1 and C2 components. It would  
93 be helpful if the authors could elucidate this explanation (Lines 520-522) and  
94 incorporate a more detailed summary in both the conclusion (Lines 586-587) and  
95 abstract.

96 Response: We draw the conclusion (original version in lines 520-522) based on the  
97 elemental compositions of the overlapping molecules assigned to C1 and C2, which  
98 consist mainly of CHON and CHO compounds. Additionally, the formation pathways  
99 of these overlapping molecules were found to be a significant part of oxidation-derived  
100 pathways, with CHON compounds primarily attributed to N<sub>2</sub>O<sub>5</sub> oxidation and the CHO  
101 compounds were highly detected in the SOA formed from limonene ozonolysis. For the  
102 revised sections, please refer to lines 763-778 in the revised manuscript.

103 In addition, the detailed summary was further discussed in the conclusion (lines 849-  
104 857) and mentioned in the abstract (lines 46-50).

105

106 Although the study identifies molecular families associated with each of the three  
107 components, their specific molecular formulas are not detailed, potentially limiting the  
108 study's replicability. Providing more information on abundant (in terms of MS signal  
109 intensity) molecular formulas associated with each component would allow other  
110 researchers to expand upon these findings. In addition, based on Lines 537-540 (Section  
111 3.4) and Figure 5, the reviewer is particularly interested in knowing the molecular  
112 formulas of major (potential) BrC species (nitro-aromatics, CHO species) within the  
113 C2 component.

114 Response: In fact, the data on correlation analysis is accessible on Harvard Dataverse  
115 (<https://doi.org/10.7910/DVN/RWIJZT>, Tang, 2023) in the data availability section for  
116 the convenience of other researchers. The reader can easily obtain the detailed  
117 molecular formulas that were assigned to each PARAFAC component (or Abs<sub>365</sub>,  
118 optical indices, and fluorescence indices) in lines 903-904 in the revised manuscript.

119 In addition, we have revised the plot and incorporated subgroups of potential BrC  
120 compounds, illustrated in the new Figure 4. It was found that CHO and CHON  
121 contributed a significant portion (98 %) of C2-assigned formulas located in the “BrC  
122 domain”, with CHON accounting for 68% of them. Furthermore, 80% of potential BrC  
123 CHON compounds assigned to C2 have O/N ≥ 3, indicating that they are species of  
124 nitro-aromatics. For more detailed information, please refer to the Harvard Dataverse  
125 (<https://doi.org/10.7910/DVN/RWIJZT>, Tang, 2023). The updated discussions were  
126 presented in lines 544-557 in the revised manuscript.

127

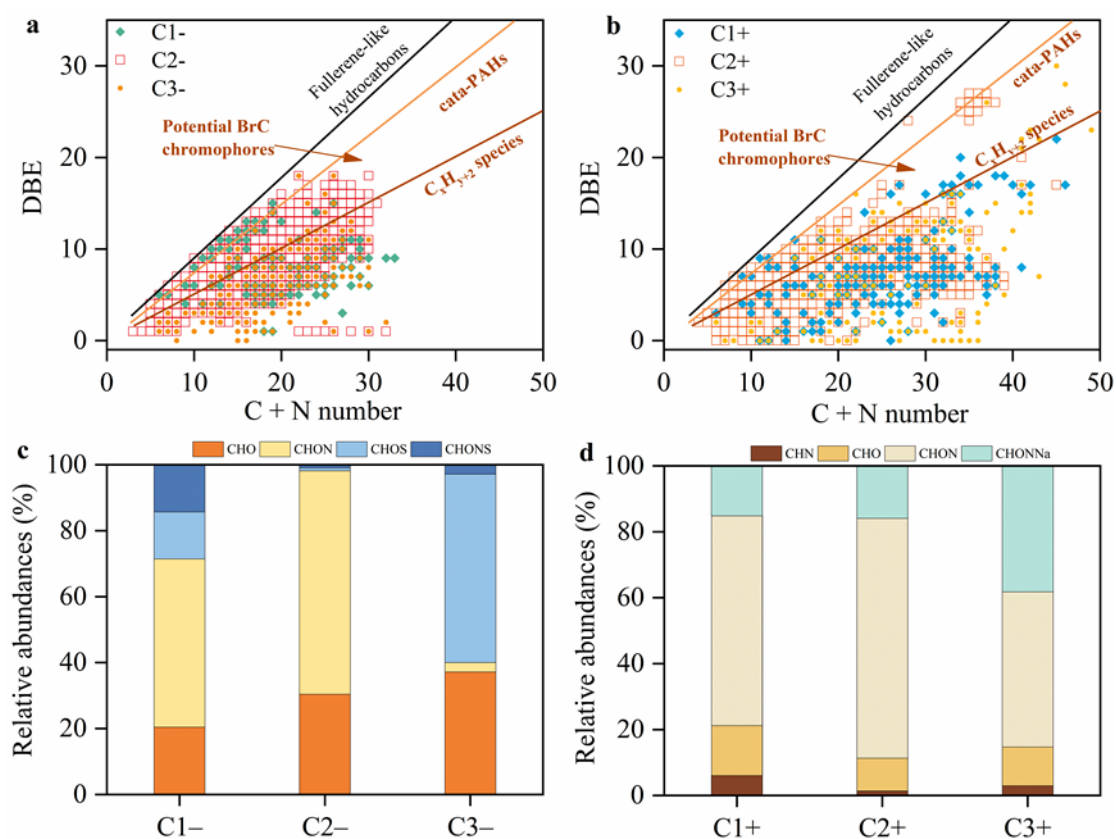

128

129

130

131

132

133

134

135

136 Line 562: It may be worthwhile to include an alternate version of this figure that  
 137 represents the number of carbon and nitrogen atoms (C+N) on the x-axis, and discuss  
 138 any discrepancies with the current version. This alternate figure might be more pertinent  
 139 to BrC, as nitroaromatic groups (if present) in CHON are potential chromophores.  
 140 When considering C+N, the data points for N-containing compounds in this figure  
 141 would shift to the right.

142

143

144

145

146

147

**Figure 4.** Plot of the double bond equivalent (DBE) vs the number of C + N atoms of PARAFAC components-assigned molecular formulas, and the corresponding subgroups of potential BrC components in the ESI- (a, c) and ESI+ (b, d) modes. Lines indicate DBE reference values of linear conjugated polyenes  $C_xH_{x+2}$  with  $DBE = 0.5 \times C$  (brown solid line), *cata*-condensed PAHs (yellow solid line), and fullerene-like hydrocarbons with  $DBE = 0.9 \times C$  (black solid line). Data points inside the lines are potential BrC chromophores (Lin et al., 2018).

**Response:** Thank you for your suggestions. We have revised this plot by adding a subgroup plot of the potential BrC components assigned to C1–3 (Figure 4). The DBE values of CHON and CHONS compounds shift right by 1-4 units due to the sum number of carbon and nitrogen atoms. The new discussions were presented in lines 544-557 in the revised manuscript.

148 Several sentences are difficult to understand, and their meanings are unclear. The  
149 authors should rectify any remaining language issues to enhance the manuscript's  
150 readability. After these improvements, another review might be required to ensure the  
151 precision of all statements in the revised manuscript.

152 **Response:** We apologize for the low quality of the language in our manuscript. We spent  
153 a long time revising the manuscript, which involved repeatedly adding and removing  
154 sentences and paragraphs. This led to a significant decrease in readability. We have  
155 worked on improving both the language and the readability of the document.  
156 Additionally, we have invited fellow experts to make professional language editing for  
157 the manuscript. We hope that the clarity and language sophistication has been  
158 significantly improved.

159

#### 160 **Additional comments and suggested edits**

161 Lines 1-3: Consider rearranging the title for clarity: "Molecular signatures and  
162 formation mechanisms of water-soluble chromophores in particulate matter from  
163 Karachi (Pakistan) in South Asia."

164 **Response:** Thank you. The title has been modified according to your recommendations.

165

166 Line 56: Change to "originates."

167 **Response:** We have revised it (in line 65).

168

169 Line 58: Change to "formation processes, such as aqueous-phase reactions from  
170 anthropogenic or biogenic emissions."

171 **Response:** We have revised it (in lines 67-68).

172

173 Lines 60-61: Change to "Light-absorbing organic (or brown) carbon (BrC) is an  
174 important component of WSOC..."

175 **Response:** We have revised it (in lines 69-71).

176

177 Line 74: Change to "...absorb light at certain wavelengths..."

178 **Response:** We have revised it (in line 85).

179

180 Lines 115-116: Could you elaborate on whether primary or aged biomass burning  
181 emissions are anticipated and how they might influence the interpretation of BrC results?

182 **Response:** Of course. In the revised paragraph, nss-ndust-K<sup>+</sup> (the fraction unrelated to  
183 sea salt and mineral dust, nss-ndust) was used as a marker of biomass burning to  
184 investigate its influences (Pio et al., 2007; Zhou et al., 2019). A good linear correlation

185 was found between  $Abs_{365}$  (a proxy for BrC) and  $nss-ndust-K^+$  ( $r = 0.57$ ,  $p < 0.01$ , Fig.  
186 S5) during non-monsoon seasons. In contrast, the absence of a linear relationship  
187 between  $Abs_{365}$  and  $nss-ndust-K^+$  in the monsoon season (Fig. S5) indicates no  
188 influence of biomass burning emissions. Consistently,  $MAE_{365}$  was higher during non-  
189 monsoon seasons than the monsoon season, which suggests that biomass burning has  
190 an important influence on water-soluble BrC during non-monsoon seasons. Please refer  
191 to lines 366-372 in the revised manuscript.

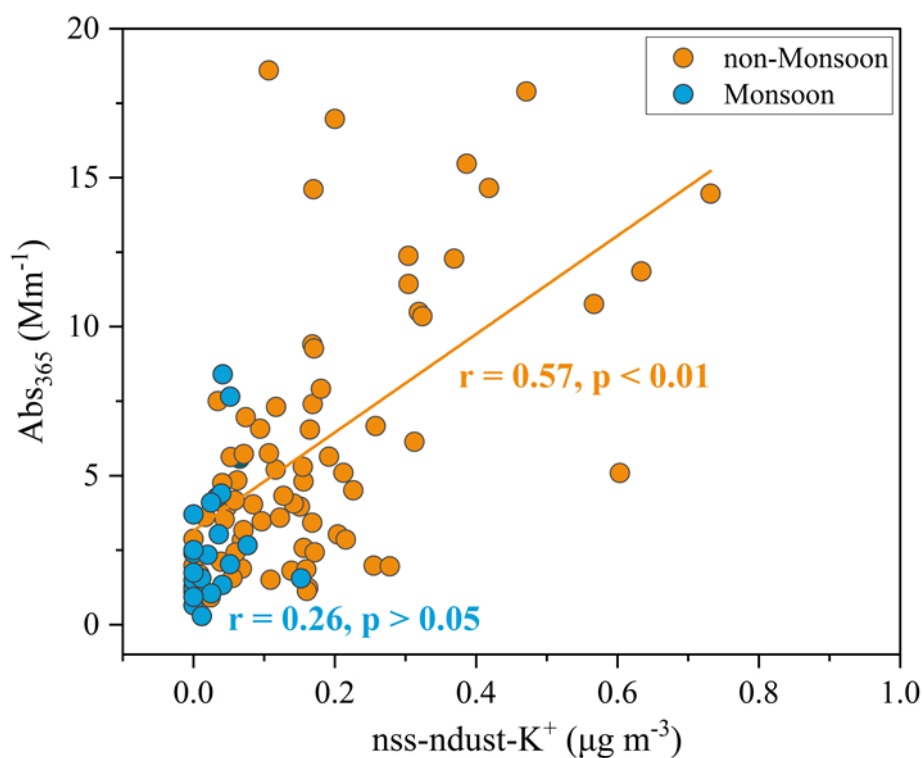

192

193 **Figure S5.** Correlation between  $nss-ndust-K^+$  and  $Abs_{365}$  in non-monsoon and monsoon seasons.

194

195 Line 126: Change to "Total suspended particulate matter (TSP) was collected..."

196 Response: We have revised it (in line 155).

197

198 Line 148: Change to "PARAFAC."

199 Response: We have revised it (in line 184).

200

201 Line 285: Please clarify what the error bars signify in panels (c) and (d).

202 Response: The error bars shown in panels c and d represent the standard deviation. We  
203 have added after the plot in lines 388-389 in the revised manuscript.

204

205 Lines 310-312: Could the authors provide insights as to whether the molecular formulas  
206 that showed no correlation with any PARAFAC component are predominantly aliphatic

207 and sugar compounds, which are not typically expected to exhibit light absorption or  
208 fluorescence?

209 Response: Of course. The molecular formulas that did not correlate with any of the  
210 PARAFAC components are predominantly aliphatic compounds and highly unsaturated  
211 and phenolic compounds (a total of 87% of the unassigned molecules in the ESI- mode  
212 and 83% in the ESI+ mode, respectively). Please refer to lines 417-420 in the revised  
213 manuscript.

214

215 Line 362: Change to "saturated."

216 Response: We have revised it (in line 485).

217

218 Line 364: Change to "lower."

219 Response: We have revised it (in line 488).

220

221 Line 604: Summarize Text S7 briefly.

222 Response: Thank you for your suggestions. We have revised it as follows: "Furthermore,  
223 the degree of molecular similarity between fluorescent components in various systems  
224 was examined. Despite the similarity of fluorescent components in the atmosphere and  
225 aquatic environment, their respective molecular formulas have substantial differences.  
226 The fluorescence characteristics derived from aquatic environments may not be suitable  
227 as references for studying atmospheric WSOC, as discussed in Text S8." Please refer to  
228 lines 887-893 in the revised manuscript.

229

### 230 **Comments on the SI**

231 Text S3: Please explain why liquid chromatography was not employed for the  
232 separation of compounds prior to the MS analysis, and discuss any potential effects this  
233 decision might have on the current study.

234 Response: This is because our aerosol samples were extracted using ultrapure water,  
235 while the bulk samples were measured directly using a fluorometer (Aqualog; Horiba  
236 Scientific, USA). Therefore, maintaining consistency of the corresponding fraction is  
237 crucial to obtain the molecular formulas using FT-ICR MS.

238 Your suggestions are very valuable. If we choose liquid chromatography to separate  
239 compounds before MS analysis, we must simultaneously obtain the EEM spectra of the  
240 separated fractions, such as the method described by Lin et al. (2015; 2016). They  
241 combine HPLC-PDA-HRMS to simultaneously obtain the light absorption and  
242 molecular compositions of BrC chromophores. In addition, this proposal provides new  
243 knowledge for investigating the molecular compositions of fluorescent components. It

244 is unavoidable that analyzing bulk samples will result in some missed underlying  
245 information. For example, Spranger et al. (2019) used a 2D-liquid chromatographic  
246 fractionation method, coupled with direct infusion electrospray ionization FT-ICR MS,  
247 and observed a 2.3-fold increase in the number of molecular formulas detected in the  
248 fractionated sample (18144) compared to bulk sample analysis without fractionation  
249 (7819). So that will be our focus in the future.

250

251 References:

252 Lin, P., Aiona, P. K., Li, Y., Shiraiwa, M., Laskin, J., Nizkorodov, S. A., and Laskin, A.: Molecular  
253 Characterization of Brown Carbon in Biomass Burning Aerosol Particles, *Environ. Sci. Technol.*,  
254 50, 11815-11824, <https://doi.org/10.1021/acs.est.6b03024>, 2016.

255 Lin, P., Laskin, J., Nizkorodov, S. A., and Laskin, A.: Revealing Brown Carbon Chromophores  
256 Produced in Reactions of Methylglyoxal with Ammonium Sulfate, *Environ. Sci. Technol.*, 49,  
257 14257-14266, <https://doi.org/10.1021/acs.est.5b03608>, 2015.

258 Spranger, T., Pinxteren, D. V., Reemtsma, T., Lechtenfeld, O. J., and Herrmann, H.: 2D Liquid  
259 Chromatographic Fractionation with Ultra-high Resolution MS Analysis Resolves a Vast Molecular  
260 Diversity of Tropospheric Particle Organics, *Environ. Sci. Technol.*, 53, 11353-11363,  
261 <https://doi.org/10.1021/acs.est.9b03839>, 2019.

262

263 Lines 149 & 154: Please elucidate the distinction between the carbon oxidation state  
264 and the nominal oxidation state of carbon. Also, provide a rationale for the application  
265 of both these metrics in this manuscript.

266 Response: These two parameters represent the oxidation state of compounds. The  
267 nominal oxidation state of carbon (NOSC) is estimated from the chemical formula by  
268 assuming that all other elements are in their initial oxidation states (H = +1, O = -2, N  
269 = -3, and S = -2) using the following equation (1) (Riedel et al., 2012), which is  
270 commonly used in aquatic and soil systems.

271 
$$\text{NOSC} = 4 - [(4c + h - 3n - 2o - 2s) / c] \quad (1)$$

272 The carbon oxidation state ( $\overline{\text{OS}}_{\text{C}}$ ) is calculated using equation (2) (Kroll et al., 2011),  
273 which is commonly used for atmospheric aerosols.

274 
$$\overline{\text{OS}}_{\text{C}} = -\sum_i \text{OS}_i \frac{n_i}{n_{\text{C}}} \quad (2)$$

275 Where,  $\text{OS}_i$  is the oxidation state associated with element  $i$ , and  $n_i/n_{\text{C}}$  is the molar ratio  
276 of element  $i$  to carbon. Furthermore, if we choose the initial oxidation states of H, O,  
277 N, and S atoms, equation (2) is equal to equation (1), as used in the study by Hettiyadura

278 et al. (2021) ( $\overline{\text{OS}}_{\text{C}} = \frac{2o}{c} + \frac{3n}{c} + \frac{2s}{s} - h/c$ ). However, predicting the average nitrogen



279 oxidation state is a very difficult or even impossible task. It is known that highly  
280 oxidized organic nitrates as well as low oxidized amines, amino acids, and other N-  
281 containing organics such as imidazoles and other N-heterocyclic compounds are present  
282 in aerosol samples. Spranger et al. (2019) assumed different oxidation states for N and  
283 S atoms, resulting in different  $\overline{OS}_C$  values. To avoid this error, we choose  $\overline{OS}_C$  to  
284 describe the oxidation state of the compounds, and make assumptions about the  $OS_i$  of  
285 the different atoms:  $OS_O = -2$ ;  $OS_H = 1$ ;  $OS_N = 0$ ;  $OS_S = 0$ , which refers to the study by  
286 Spranger et al. (2019). Thus, the carbon oxidation state ( $\overline{OS}_C$ ) of individual compounds  
287 was calculated as  $\overline{OS}_C = 2 \cdot O/C - H/C$ .

288

289 References:

290 Hettiyadura, A. P. S., Garcia, V., Li, C., West, C. P., Tomlin, J., He, Q., Rudich, Y., and Laskin, A.:  
291 Chemical Composition and Molecular-Specific Optical Properties of Atmospheric Brown Carbon  
292 Associated with Biomass Burning, *Environ. Sci. Technol.*, 55, 2511-2521,  
293 <https://doi.org/10.1021/acs.est.0c05883>, 2021.

294 Riedel, T., Biester, H., and Dittmar, T.: Molecular Fractionation of Dissolved Organic Matter with  
295 Metal Salts, *Environ. Sci. Technol.*, 46, 4419-4426, <https://doi.org/10.1021/es203901u>, 2012.

296 Spranger, T., Pinxteren, D. V., Reemtsma, T., Lechtenfeld, O. J., and Herrmann, H.: 2D Liquid  
297 Chromatographic Fractionation with Ultra-high Resolution MS Analysis Resolves a Vast Molecular  
298 Diversity of Tropospheric Particle Organics, *Environ. Sci. Technol.*, 53, 11353-11363,  
299 <https://doi.org/10.1021/acs.est.9b03839>, 2019.

300

301 Line 209: Remove "using."

302 Response: We have revised it (in line 249).

303

304 Line 232: Remove the first "that."

305 Response: We have revised it (in line 312).

306

307 Line 233: Change to "may not have the same character as in..." or similar.

308 Response: We have revised it (in line 315).

309

310 Lines 249-251: Rewrite the sentence for clarity.

311 Response: We have rewritten it as follows: ...whereas C1 formulas (in lakes) grouped  
312 in aromatic compounds region. This implies that although some PARAFAC  
313 components have similar fluorescence patterns and excitation/emission maximum, their  
314 chemical properties vary in different environments. For instance, the degree of

315 unsaturation in environment can affect them. Please refer to lines 334-339 in the revised  
316 supplement.

317

318 Line 380: Correct "streams" in the figure legend.

319 Response: We apologize for this error. We have corrected the plot as follows.

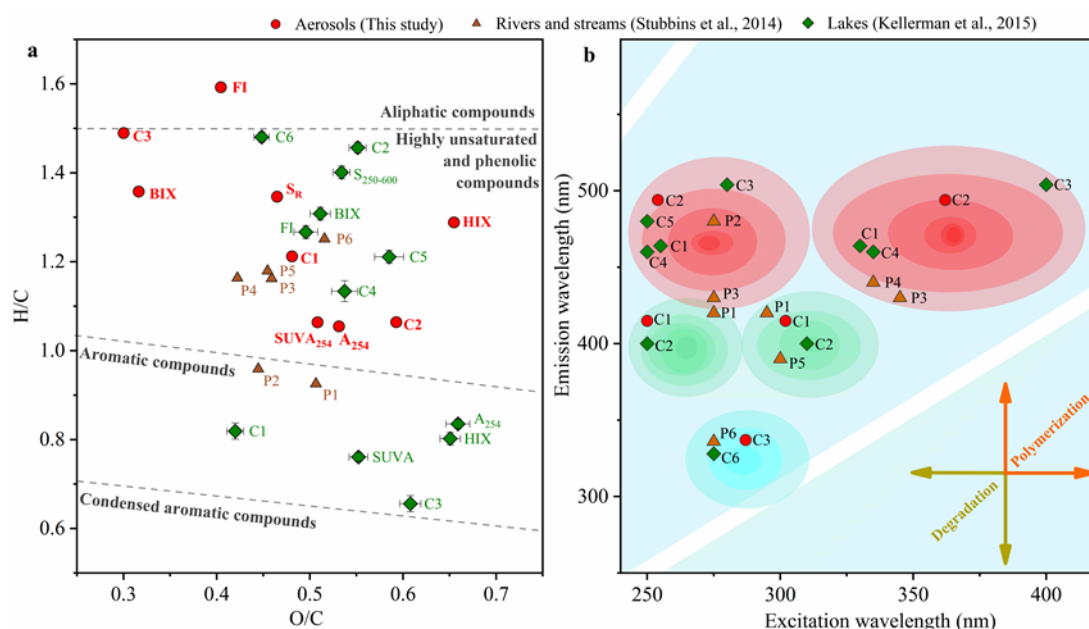

320

321 **Figure S15. (a)** Comparison of the average chemical characteristics of molecules assigned to C1,  
322 C2, and C3, as well as the optical indices of WSOC in the aerosols (marked as red dot), DOM from  
323 rivers and streams (brown triangle, fluorescent component P1–6) and lakes (green diamond,  
324 fluorescent component C1–6, and FI, BIX, HIX, SUVA, A<sub>254</sub>, and S<sub>250-600</sub>); **(b)** the corresponding  
325 excitation and emission maxima in the EEM spectra (Stubbins et al., 2014; Kellerman et al., 2015).  
326 Note that the fluorescent components associated with molecular data **(a)** of DOM in rivers and  
327 streams were re-extracted from their supplement and the error bars were not shown. The error bars  
328 in this study are shown in Table S5. The range of the red circle, green circle, and blue circle **(b)**  
329 represent the range of HULIS-2, HULIS-1, and PLOM fluorescence, respectively. The arrows  
330 indicate polymerization and degradation defined according to the study (Chen et al., 2016).

331

332

333
