# Supplementary material for: Molecular signatures and formation mechanisms of particulate matter (PM) water-soluble chromophores from Karachi (Pakistan) over South Asia
Source: Copernicus journal article supplement (doi:10.5194/egusphere-2023-403), 2023-03-29
Supplement: Supplementary file [file egusphere-2023-403-AC2-supplement.pdf]

334 Thanks to the anonymous reviewer for their constructive comments on the manuscript  
335 and helpful suggestions for further improvement. Please find detailed responses below  
336 in blue-color font.

337

## 338 **Response to Anonymous Referee #2**

339

### 340 **Summary:**

341

342 In this scientific work, the authors have used excitation-emission matrix (EEM)  
343 fluorescence spectroscopy coupled with Fourier transform ion cyclotron resonance  
344 mass spectroscopy (FT-ICRMS) to study the chemical composition of water soluble  
345 organic carbon (WSOC) ambient aerosols in Karachi, Pakistan. In addition to that, they  
346 tried to postulate the different formation mechanisms of these organic compounds. They  
347 identified three broad components of moieties using parallel factor analysis  
348 (PARAFAC), of which two were humic-like (C1 and C2) and one was protein like (C3).  
349 They also tried to correlate these PARAFAC components to the extensive datasets of  
350 brown carbon (BrC) chromophores available in literature through the total number of  
351 carbon (C) atoms present in the molecular formula and double-bond equivalence (DBE).  
352 Except the discussion of formation mechanism, the rest of the methodology and  
353 findings of this work is quite trivial and another repetition of multiple EEM  
354 spectroscopy based ambient aerosol characterization studies.

355 **Response:** We appreciate your valuable comments and suggestions, which can help  
356 improve the manuscript.

357 EEM fluorescence spectroscopy was initially employed to study chromophoric  
358 dissolved organic matter (CDOM) in terrestrial and oceanic systems before being used  
359 for atmospheric aerosol research. It has been suggested that organic chromophores  
360 differ across various environments, including aquatic systems and aerosols (H. Jiang et  
361 al., 2022; Wu et al., 2022). Studying the molecular compositions of fluorophores,  
362 specifically the fluorescent components decomposed by PARAFAC analysis, is crucial  
363 for improving our understanding of their structures, sources, and chemical properties in  
364 the atmosphere. Although the molecular compositions of PARAFAC components in  
365 aquatic systems have been well described (Kellerman et al., 2015; Stubbins et al., 2014),  
366 only a few studies have been conducted on these components in the atmosphere. Chen  
367 et al. (2016) investigated the chemical compositions of water-soluble PARAFAC  
368 components. However, they were unable to provide the corresponding molecular  
369 formulas using high-resolution aerosol mass spectrometers (HR-AMS). F. Jiang et al.  
370 (2022) and H. Jiang et al. (2022) provided respective molecular formulas for PARAFAC

371 components. However, their primary focus was on the methanol-extracted fractions and  
372 not water-extracts, which can significantly differ. To the best of our knowledge, only a  
373 recent study has provided the molecular formulas associated with water-soluble  
374 PARAFAC components in PM<sub>2.5</sub> collected in Guangzhou, a city in Southern China (He  
375 et al., 2023). However, they did not investigate the potential formation pathways of  
376 PARAFAC components and the molecular-level correlation between them and BrC. It  
377 is important to constrain the optical properties of BrC aerosols.

378 Additionally, our investigation discovered molecular formulas detected in the ESI+  
379 mode that exhibit a significant correlation with PARAFAC components, providing a  
380 more comprehensive molecular characterization of them. The main objective of our  
381 study is to identify the molecular compositions and formation mechanisms of  
382 PARAFAC components in water-soluble organic carbon (WSOC), with a particular on  
383 identifying the relevant pathways, which, to our knowledge, have not been reported  
384 previously. Additionally, identification of diverse molecular compositions and  
385 formation pathways of commonly detected fluorescent components in the atmosphere  
386 will provide valuable information, particularly when utilizing EEM in combination with  
387 PARAFAC analysis to study atmospheric BrC. Thus, our work assists in  
388 comprehending the composition and fate of PARAFAC components and enhances the  
389 utilization of the EEM-PARAFAC method in characterizing atmospheric BrC. This is  
390 the novelty and significance of our work.

391

## 392 **References:**

393 He, T., Wu, Y., Wang, D., Cai, J., Song, J., Yu, Z., Zeng, X., and Peng, P. a.: Molecular compositions  
394 and optical properties of water-soluble brown carbon during the autumn and winter in Guangzhou,  
395 China, *Atmos. Environ.*, 296, <https://doi.org/10.1016/j.atmosenv.2022.119573>, 2023.

396 Jiang, F., Song, J., Bauer, J., Gao, L., Vallon, M., Gebhardt, R., Leisner, T., Norra, S., and Saathoff,  
397 H.: Chromophores and chemical composition of brown carbon characterized at an urban kerbside  
398 by excitation–emission spectroscopy and mass spectrometry, *Atmos. Chem. Phys.*, 22, 14971-14986,  
399 <https://doi.org/10.5194/acp-22-14971-2022>, 2022.

400 Jiang, H., Tang, J., Li, J., Zhao, S., Mo, Y., Tian, C., Zhang, X., Jiang, B., Liao, Y., Chen, Y., and  
401 Zhang, G.: Molecular Signatures and Sources of Fluorescent Components in Atmospheric Organic  
402 Matter in South China, *Environ. Sci. Technol. Lett.*, 9, 913-920,  
403 <https://doi.org/10.1021/acs.estlett.2c00629>, 2022.

404 Kellerman, A. M., Kothawala, D. N., Dittmar, T., and Tranvik, L. J.: Persistence of dissolved organic  
405 matter in lakes related to its molecular characteristics, *Nat. Geosci.*, 8, 454-U452,  
406 <https://doi.org/10.1038/ngeo2440>, 2015.

407 Stubbins, A., Lapierre, J. F., Berggren, M., Prairie, Y. T., Dittmar, T., and del Giorgio, P. A.: What's  
408 in an EEM? Molecular signatures associated with dissolved organic fluorescence in boreal Canada,  
409 *Environ. Sci. Technol.*, 48, 10598-10606, <https://doi.org/10.1021/es502086e>, 2014.

410 Wu, G., Fu, P., Ram, K., Song, J., Chen, Q., Kawamura, K., Wan, X., Kang, S., Wang, X., Laskin,  
411 A., and Cong, Z.: Fluorescence characteristics of water-soluble organic carbon in atmospheric  
412 aerosol, *Environ. Pollut.*, 268, 115906, <https://doi.org/10.1016/j.envpol.2020.115906>, 2021.

413

414 **Strength of this work:**

415

416 The authors analysed the FT-ICR MS data and came up with the most probable  
417 formation mechanisms from different molecular signals in addition to EEM  
418 spectroscopic studies.

419 *Response: We appreciate the reviewer for providing valuable suggestions.*

420

421 **Limitations of this work:**

422

423 *Lack of discussion on seasonal variation:* As seen in Figure 1, the study site is located  
424 at a very interesting geographical location with great seasonal variation in wind  
425 direction. In pre-monsoon and monsoon, the wind flow is directed from middle-east  
426 Asia and Arabian Sea, whereas the wind trajectories arise from North Pakistan and  
427 North-West India during post-monsoon and winter. This will result in very different  
428 chemical compositions of ambient particulate matter (PM) reaching the study site. For  
429 example, in the months of May-June, the aerosol composition will be close to marine  
430 aerosol composition, but in Oct-Dec there will be molecular signals of biomass burning  
431 emissions as previous studies have pointed out extensive crop burning and biomass  
432 burning for heat generation during winter in that part of the world. Which suggests that  
433 the wintertime aerosols will probably have higher S content and less oxygenated  
434 organics because the OH radical photochemistry is limited during winter and the  
435 atmospheric transformation is driven by NO<sub>x</sub> chemistry. The authors have reported all  
436 the data in a combined way, which does not give the readers the broader picture of the  
437 regional specific atmospheric chemistry of the study site. Postulating molecular  
438 formation pathways without considering the meteorological conditions can also lead to  
439 erroneous assumptions.

440 *Response: Thank you for your suggestions. We chose this station as a typical region to*  
441 *study this topic due to its special geographical location. The station experiences great*  
442 *seasonal variation in wind direction, resulting in varying chemical compositions. This*  
443 *is evident from the differences in light absorption and fluorescence intensities across*  
444 *different seasons. Additionally, the molecular composition also differs across different*

445 seasons, a detail that was not shown in our original version. Our recent research has  
446 shown that continental-influenced WSOC has a higher composition of aromatic and  
447 highly oxidized compounds. Conversely, marine-influenced WSOC has a large  
448 availability of marine organic compounds that are saturated and have a lower degree of  
449 oxidation (Mo et al., 2022). This may highlight similarities in molecular characteristics  
450 between different air mass influences, compared to this study.

451 Because our primary objective is to obtain the molecular signatures and formation  
452 mechanisms of the fluorescent components decomposed by PARAFAC analysis, which  
453 is crucial for studying atmospheric BrC, we need subjective evaluations unless they are  
454 unambiguously marked as such. We appreciate your suggestions and as a result, we  
455 included the detailed molecular characteristics of each sample in different seasons in  
456 Tables S3 and S4 in the supplement for readers' reference.

457

458 Reference:

459 Mo, Y., Zhong, G., Li, J., Liu, X., Jiang, H., Tang, J., Jiang, B., Liao, Y., Cheng, Z., and Zhang, G.:  
460 The Sources, Molecular Compositions, and Light Absorption Properties of Water - Soluble Organic  
461 Carbon in Marine Aerosols From South China Sea to the Eastern Indian Ocean, *J. Geophys. Res.-*  
462 *Atmos.*, 127, <https://doi.org/10.1029/2021jd036168>, 2022.

463

464 *Lack of relevant references:* In continuation to the previous point, as the authors have  
465 not discussed the geographical context of this work, they have also failed to compare  
466 their findings with previous works carried out in similar locations. Although they have  
467 mentioned a few studies carried out in the Indo-Gangetic Plane (IGP) while reporting  
468 mass absorption efficiency (MAE) and Aerosol absorption exponent (AAE), this kind  
469 of comparisons have not been made for EEM spectroscopic studies. Previous EEM  
470 spectroscopic analyses of ambient aerosol in IGP and other parts of the world have  
471 found similar PARAFAC components (two HULIS and one protein like). These  
472 references from around the globe should be mentioned and compared with the findings  
473 of this work.

474 *Response:* Thank you for your suggestions. We regret our negligence in discussing the  
475 comparison with EEM spectroscopic studies. In order to improve the comprehension of  
476 the characteristics of fluorescent components in this geographic location, we have  
477 added a new discussion on the comparison in the revised manuscript. Please refer to the  
478 specified lines 290-307.

479

480 *Structure of the Results and Discussion Section:* The results and discussions section  
481 needs to be restructured. For the convenience of the readers, the discussion of

482 “Underlying implication of PARAFAC component to BrC absorption” should be done  
483 under section 3.3 and the discussion on formation pathways should be under section  
484 3.4. That way the flow of information will be more coherent.

485 [Response: Thanks for the suggestions. In the revised manuscript, we have restructured](#)  
486 [section 3.3 to discuss “Underlying implications of PARAFAC components on BrC](#)  
487 [absorption” \(lines 506-567\) and section 3.4 to discuss “Potential formation mechanisms](#)  
488 [of PARAFAC components” \(lines 576-778\).](#)

489

490 The discussion on formation pathway of S-containing compounds should be more  
491 condense and can also be moved to supplementary information (SI). The authors have  
492 mentioned that S containing compounds have almost no effect on BrC chromophores.  
493 They also reported that the two Humic-like PARAFAC components had very little S  
494 containing compounds, mostly component C3 had the highest S containing compound.  
495 Eventually it has also been shown that component C3 has the lowest overlap with the  
496 BrC region in figure 5. Therefore, in terms of climate relevant BrC chromophores, this  
497 pathway is not as important as CHO and CHON formation pathways.

498 [Response: Thank you for your suggestion regarding the formation pathway of S-](#)  
499 [containing compounds. According to previous studies, S-containing compounds have](#)  
500 [little or no impact on BrC chromophores. Therefore, discussing S-containing](#)  
501 [compounds may be confusing for readers. We have revised this section and moved it to](#)  
502 [Text S7 in the revised supplement \(lines 271-305\).](#)

503

504 The overall grammar and clarity of the current section 3.3 (proposed to be made section  
505 3.4 after restructuring) is unsatisfactory. Too much statistics have been used in  
506 sentences, which can instead be represented graphically. Sentences need to be written  
507 with proper grammar, for example 407-408 is unclear and needs to be rewritten, so does  
508 413. There are many occurrences like this, so the reviewer suggests a rewriting of this  
509 whole section in a clear and concise manner. In the rewriting, the authors should also  
510 elaborate and clarify how they reached conclusions made in 520-522.

511 **But most importantly in this section**, the authors have looked at some  
512 molecular signals found through FT-ICR MS and compared those molecules with aged  
513 byproducts of certain precursors reported in previous literature. And by doing that they  
514 have tried to postulate these known reaction pathways to be present in their study  
515 samples. These are good hypotheses, but there is no concrete way of establishing these  
516 reaction pathways in the scope of this study. Therefore, it doesn't add up as novel new  
517 information. If the authors can combine other analytical study with the collected filters  
518 (if there is any remaining), for example <sup>1</sup>H NMR spectroscopy of WSOC, in which they

519 can quantitatively compare the spectra of the precursor and aged molecules with their  
520 sample spectra and confirm its presence, that would be a much stronger argument for  
521 the formation pathways.

522 Response: We apologize for the low quality of the language in our manuscript. We spent  
523 a long time revising the manuscript, which involved repeatedly adding and removing  
524 sentences and paragraphs. This led to a significant decrease in readability. We have  
525 worked on improving both the language and the readability of the document.  
526 Additionally, we have invited fellow experts to make professional language editing for  
527 the manuscript. We hope that the flow and language level have been significantly  
528 improved.

529 Furthermore, the sentence in original lines 407-408 was modified as follows: “For  
530 instance, Mo et al. (2018) demonstrated that 98% of CHON compounds found in PM<sub>2.5</sub>  
531 collected from Beijing have  $O/N \geq 3$ . This finding indicates that the compound has at  
532 least one nitro ( $-NO_2$ ) or nitrooxy ( $-ONO_2$ ) group in addition to other oxygen-  
533 containing groups (i.e.,  $-OH$  and  $-COOH$ ).” Please refer to lines 618-622 in the revised  
534 manuscript.

535 The sentence in original lines 413 was modified as follows: “However, oxidized CHON  
536 formulas assigned to C1 and C2 may be underestimated as they contain two or more N  
537 atoms and do not require three folds of O atoms to form  $-NO_2$  or  $-ONO_2$  groups.”  
538 Please refer to lines 626-629 in the revised manuscript.

539 We draw the conclusion (original version in lines 520-522) based on the elemental  
540 compositions of the overlapping molecules assigned to C1 and C2, which consist  
541 mainly of CHON and CHO compounds. Additionally, the formation pathways of these  
542 overlapping molecules were found to be a significant part of oxidation-derived  
543 pathways, with CHON compounds primarily attributed to  $N_2O_5$  oxidation and the CHO  
544 compounds were highly detected in the SOA formed from limonene ozonolysis. For the  
545 revised sections, please refer to lines 763-778 in the revised manuscript.

546 Additionally, we hope to explore the formation pathways of PARAFAC components by  
547 comparing the assigned molecules to those reported in previous studies, despite the  
548 potential for uncertainty. This approach may offer additional clarity on the possible  
549 formation pathways of PARAFAC components. For example, when comparing the  
550 CHO compounds assigned to PARAFAC components to the SOA formed from  
551 limonene ozonolysis, our focus is on the presence of oxidized CHO compounds rather  
552 than on the precursors. Also, when comparing to the CHO compounds resulting from  
553 the photooxidation of naphthalene, biomass burning emissions, and aqueous-phase  
554 reactions of phenols, we have obtained new insight into the high aromatic structures  
555 and the predominance of C2 formulas in an oxidative form. As we concluded, the

556 oxidation pathway appears to be the main pathway for the formation of C1 and C2.  
557 Indeed, the use of <sup>1</sup>H NMR spectroscopy is important to characterizing WSOC and  
558 obtaining insight into their structural characteristics. However, there are no remaining  
559 samples for subsequent analysis. This study presents preliminary findings on the  
560 formation pathways of PARAFAC components, given their complexity. In the future,  
561 other analytical techniques, such as <sup>1</sup>H NMR spectroscopy, should be combined to  
562 provide deeper insight into the formation pathways of fluorescent components.

563

564 **Minor corrections:**

565 Title: The title should be reconsidered. Instead of water soluble particulate matter, water  
566 soluble organic carbon is a preferable choice. The study location should be kept Karachi  
567 or mentioned a location in South East Asia.

568 Response: Thank you for the suggestions. The title has been revised as follows:  
569 “Molecular signatures and formation mechanisms of water-soluble chromophores in  
570 particulate matter from Karachi (Pakistan) in South Asia”

571

572 **Corrections in SI:**

573 Figure S2: The title of the figure mentions February 16, but the legend in the figure  
574 shows the trajectory starting from 17 February 2016.

575 Response: We apologize for the error. The figure has been revised by redrawing it due  
576 to the low resolution of the original version. We now present the updated figure below.

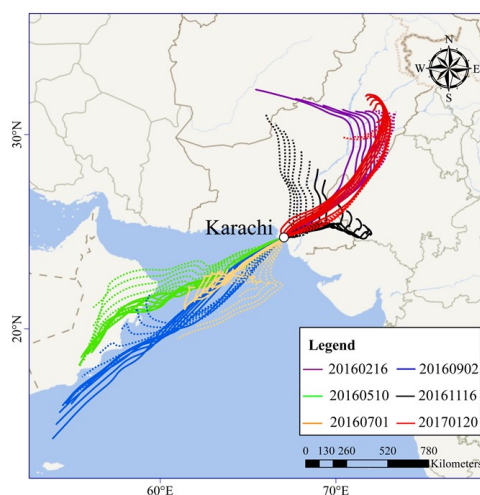

577

578 **Figure S2.** The 72 h back air-mass trajectories at Karachi from Pakistan for the selected samples  
579 via FT-ICR MS analysis on February 16, May 10, July 1, September 2, November 16, 2016, and  
580 January 20, 2017, correspond to different seasons. The trajectories with black dots represent the  
581 corresponding night, otherwise, it is the day. The air-mass trajectories were analyzed by the

582 HYSPLIT model. The map was created using Arcgis software, and the base map is from the National  
583 Platform for Common Geospatial Information Services ([www.webmap.cn](http://www.webmap.cn)).
